# Supplementary material for: Pain Management Mobile Applications: A Systematic Review of Commercial and Research Efforts
Source: MDPI journal article supplement (doi:10.3390/s23156965), 2023-08-05
Supplement: s1 [file s1]

| No. | Quality assessment question                                             | Weight                                                                                                                                                                                                                                                       |
|-----|-------------------------------------------------------------------------|--------------------------------------------------------------------------------------------------------------------------------------------------------------------------------------------------------------------------------------------------------------|
| QC1 | Targeted condition specified?                                           | Yes (+1), No (+0)                                                                                                                                                                                                                                            |
| QC2 | Targeted population specified?                                          | Yes (+1), No (+0)                                                                                                                                                                                                                                            |
| QC3 | Is the technological solution presented in details?                     | Yes (+1), Partially (+0.5), No (+0)                                                                                                                                                                                                                          |
| QC4 | Is the pain assessment methodology presented in details?                | Yes (+1), Partially (+0.5), No (+0)                                                                                                                                                                                                                          |
| QC5 | Is the evaluation/assessment method specified and presented in details? | Yes (+1) / Partially (+0.5), No (+0)                                                                                                                                                                                                                         |
| QC6 | Is the paper published in a recognized source?                          | Conferences, Workshops: CORE A* or A (+1.5), CORE B (+1), CORE C (+0.5), not included in CORE ranking (+0).<br>Journals:<br>ranked Q1 (+2), ranked Q2 (+1.5), ranked Q3 or Q4 (+1), no JCR ranking (+0)<br>Other sources: (+0)<br>Books, Lecture Notes: (+2) |

**Table S1.** Quality assessment criteria (for articles)

| No. | Extracted data                                                                                                                                                  |
|-----|-----------------------------------------------------------------------------------------------------------------------------------------------------------------|
| RQ1 | Categorization of the population targeted should be defined (e.g., patients, carers, teachers, etc.).                                                           |
| RQ2 | The health topic should be extracted to identify the health condition addressed.                                                                                |
| RQ3 | The technological domain addressed should be presented (e.g., hardware or software solution, other related info like the use of artificial intelligence, etc.). |
| RQ4 | Publication year is required.                                                                                                                                   |
| RQ5 | The technology assessment methodology should be presented.                                                                                                      |
| RQ6 | The pain assessment methodology should be presented.                                                                                                            |
| RQ7 | User assessment methodology should be presented                                                                                                                 |

**Table S2.** Data extraction (for articles)

| No. | Quality assessment question   | Weight            |
|-----|-------------------------------|-------------------|
| QC1 | Targeted condition specified? | Yes (+1), No (+0) |
| QC2 | Design methodology described  | Yes (+1), No (+0) |

**Table S3.** Quality assessment criteria (for commercial apps)

| No.  | Extracted data                                                                       |
|------|--------------------------------------------------------------------------------------|
| RQ1b | The health topic should be extracted to identify the health condition addressed.     |
| RQ2b | The targeted platform should be presented                                            |
| RQ3b | The design methodology should be presented (e.g., involvement of patients and HCPs). |

**Table S4.** Data extraction (for commercial apps)

| Ref.                            | QC1 | QC2 | QC3 | QC4 | QC5 | QC6 | QA Score |
|---------------------------------|-----|-----|-----|-----|-----|-----|----------|
| Peters et al., 2000 [14]        | 1.0 | 1.0 | 0   | 0.5 | 0.5 | 2.0 | 5.0      |
| Jamison et al., 2001 [15]       | 1.0 | 1.0 | 0   | 0   | 0   | 2.0 | 4.0      |
| Jamison et al., 2002 [16]       | 1.0 | 1.0 | 0   | 0   | 0.5 | 2   | 4.5      |
| Walker et al., 2002 [17]        | 1.0 | 1.0 | 0   | 0.5 | 0.5 | 1.5 | 4.5      |
| Goldstein et al., 2003 [18]     | 1.0 | 1.0 | 0   | 0   | 0   | 1.5 | 3.5      |
| Stone et al., 2003 [19]         | 1.0 | 1.0 | 0   | 0   | 0   | 2.0 | 4.0      |
| VanDenKerkhof et al., 2003 [20] | 1.0 | 1.0 | 0   | 0   | 0   | 1.5 | 3.5      |
| Chan et al., 2004 [21]          | 1.0 | 1.0 | 0   | 0   | 0   | 1.0 | 3.0      |
| Gaertner et al., 2004 [22]      | 1.0 | 1.0 | 0   | 0   | 0   | 2.0 | 4.0      |
| Palermo et al., 2004 [23]       | 1.0 | 1.0 | 0   | 0   | 0.5 | 2.0 | 4.5      |
| Roelofs et al., 2004 [24]       | 1.0 | 1.0 | 0   | 0   | 0   | 2.0 | 4.0      |
| Serif and Ghinea, 2005 [25]     | 1.0 | 1.0 | 0   | 0   | 1.0 | 0   | 3.0      |
| Aaron et al., 2005 [26]         | 1.0 | 1.0 | 0   | 0.5 | 0   | 2.0 | 4.5      |
| Turner et al., 2005 [27]        | 1.0 | 1.0 | 0   | 0.5 | 0   | 2.0 | 4.5      |
| Kearney et. al., 2006 [28]      | 1.0 | 1.0 | 0   | 0   | 1.0 | 1.5 | 4.5      |
| Aaron et al., 2006 [29]         | 1.0 | 1.0 | 0   | 0.5 | 0   | 0   | 2.5      |
| Jamison et al., 2006 [30]       | 1.0 | 1.0 | 0   | 0   | 0   | 2.0 | 4.0      |
| Roelofs et al., 2006 [31]       | 1.0 | 1.0 | 0   | 0   | 0   | 1.5 | 3.5      |
| Sorbi et al., 2006 [32]         | 1.0 | 1.0 | 0   | 0   | 0   | 1.5 | 3.5      |
| Sorbi et al., 2006 [33]         | 1.0 | 1.0 | 0   | 0   | 0   | 1.5 | 3.5      |
| Stinson et al., 2006 [34]       | 1.0 | 1.0 | 0   | 0.5 | 0.5 | 1.5 | 4.5      |
| Sorbi et.al., 2007 [35]         | 1.0 | 1.0 | 0   | 0   | 1.0 | 2.0 | 5.0      |
| Evans et al., 2007 [36]         | 1.0 | 1.0 | 0   | 0.5 | 0   | 1.5 | 4.0      |
| Goldberg et al., 2007 [37]      | 1.0 | 1.0 | 0   | 0.5 | 0   | 2.0 | 4.5      |
| Heiberg et al., 2007 [38]       | 1.0 | 1.0 | 0   | 0.5 | 0   | 2.0 | 4.5      |
| Ghinea et al., 2008 [39]        | 1.0 | 1.0 | 0   | 0.5 | 0   | 0   | 2.5      |
| Junker et al., 2008 [40]        | 1.0 | 1.0 | 0   | 0   | 0   | 1.5 | 3.5      |
| Stinson et al., 2008 [41]       | 1.0 | 1.0 | 0   | 0.5 | 0.5 | 1.0 | 4.0      |
| Stinson et al., 2008 [42]       | 1.0 | 1.0 | 0   | 0.5 | 0.5 | 2.0 | 5.0      |
| Anatchkova, et. al., 2009 [43]  | 1.0 | 1.0 | 0   | 0.5 | 1.0 | 2.0 | 5.5      |
| McClellan et al., 2009 [44]     | 1.0 | 1.0 | 1.0 | 0.5 | 1.0 | 1.5 | 6.0      |
| Gulur et al., 2009 [45]         | 1.0 | 1.0 | 0   | 0   | 0.5 | 2.0 | 4.5      |
| Lewandowski et al., 2009 [46]   | 1.0 | 1.0 | 0   | 0   | 0.5 | 1.5 | 4.0      |
| Kleiboer et al., 2009 [47]      | 1.0 | 1.0 | 0   | 0   | 0.5 | 1.0 | 3.5      |
| Sorbi et al., 2010 [48]         | 1.0 | 1.0 | 0   | 0   | 0.5 | 2.0 | 4.5      |
| Hachizuka et al., 2010 [49]     | 1.0 | 1.0 | 0.5 | 0   | 1.0 | 1.0 | 4.5      |

|                                   |     |     |     |     |     |     |     |
|-----------------------------------|-----|-----|-----|-----|-----|-----|-----|
| Luckmann and Vidal, 2010 [50]     | 1.0 | 1.0 | 0.5 | 0   | 1.0 | 1.5 | 5.0 |
| Alfvén 2010 [51]                  | 1.0 | 1.0 | 0   | 0.5 | 0.0 | 1.5 | 4.0 |
| Connelly et al., 2010 [52]        | 1.0 | 1.0 | 0   | 0.5 | 0.0 | 2.0 | 4.5 |
| Connelly et al., 2010 [53]        | 1.0 | 1.0 | 0.5 | 0.5 | 0   | 2.0 | 5.0 |
| Marceau et al., 2010 [54]         | 1.0 | 1.0 | 0   | 0.5 | 0.0 | 2.0 | 4.5 |
| Connelly et al., 2011 [55]        | 1.0 | 1.0 | 0.5 | 0.5 | 0   | 1.5 | 4.5 |
| Kristjánsdóttir et al., 2011 [56] | 1.0 | 1.0 | 0.5 | 0   | 0   | 1.0 | 3.5 |
| Rosser et al., 2011 [57]          | 1.0 | 1.0 | 0   | 0   | 0   | 1.0 | 3.0 |
| Rosser and Eccleston, 2011 [6]    | 1.0 | 1.0 | 0   | 0   | 0   | 1.0 | 3.0 |
| Wood et al., 2011 [58]            | 1.0 | 1.0 | 0   | 0.5 | 0   | 1.5 | 4.0 |
| Allena et al., 2012 [59]          | 1.0 | 1.0 | 0   | 0.5 | 0   | 2.0 | 4.5 |
| Baggott et al., 2012 [60]         | 1.0 | 1.0 | 0   | 0   | 1.0 | 0   | 3.0 |
| Jibb et al., 2012 [61]            | 1.0 | 1.0 | 0   | 0   | 0   | 2.0 | 4.0 |
| Spyridonis et al., 2012 [62]      | 1.0 | 1.0 | 0   | 0   | 1.0 | 0.5 | 3.0 |
| Jacob et al., 2012 [63]           | 1.0 | 1.0 | 1.0 | 0.5 | 1.0 | 1.0 | 5.5 |
| Jacob et al., 2013 [64]           | 1.0 | 1.0 | 1.0 | 0.5 | 1.0 | 1.5 | 6.0 |
| Nes et al., 2013 [65]             | 1.0 | 1.0 | 0.5 | 0   | 0   | 2.0 | 4.5 |
| Stinson et al., 2013 [66]         | 1.0 | 1.0 | 1.0 | 0   | 1.0 | 2.0 | 6.0 |
| Kristjánsdóttir et al., 2013 [67] | 1.0 | 1.0 | 0.5 | 0   | 0   | 2.0 | 4.5 |
| Kristjánsdóttir et al., 2013 [68] | 1.0 | 1.0 | 0.5 | 0   | 0   | 2.0 | 4.5 |
| Blödt et al., 2014 [69]           | 1.0 | 1.0 | 0.5 | 0   | 0   | 1.0 | 3.5 |
| Garcia-Palacios et al., 2014 [70] | 1.0 | 1.0 | 0.5 | 0   | 1.0 | 1.5 | 5.0 |
| Jibb et al., 2014 [71]            | 1.0 | 1.0 | 0.5 | 0   | 1.0 | 0   | 3.5 |
| Pombo et al., 2014 [72]           | 1.0 | 1.0 | 0.5 | 0   | 1.0 | 1.0 | 4.5 |
| Bakshi et al., 2015 [73]          | 1.0 | 1.0 | 0.5 | 0   | 1.0 | 1.5 | 5.0 |
| Huguet et al., 2015 [74]          | 1.0 | 1.0 | 0.5 | 0   | 1.0 | 2.0 | 5.5 |
| Jonassaint et al., 2015 [75]      | 1.0 | 1.0 | 1.0 | 0   | 1.0 | 1.0 | 5.0 |
| Maguire et al., 2015 [76]         | 1.0 | 1.0 | 1.0 | 0   | 1.0 | 2.0 | 6.0 |
| Nguyen et al., 2015 [77]          | 1.0 | 1.0 | 1.0 | 0   | 1.0 | 0.5 | 4.5 |
| Fortier et al., 2016 [78]         | 1.0 | 1.0 | 1.0 | 0   | 1.0 | 2.0 | 6.0 |
| Hochstenbach et al., 2016 [79]    | 1.0 | 1.0 | 1.0 | 0   | 1.0 | 2.0 | 6.0 |
| Ingadottir et al., 2017 [80]      | 1.0 | 1.0 | 1.0 | 0   | 1.0 | 1.5 | 5.5 |
| Jibb et al., 2017 [81]            | 1.0 | 1.0 | 1.0 | 0   | 1.0 | 1.5 | 5.5 |

**Table S5.** Selected papers and review results #1

| Ref.                                                                       | Pain Type                                   | Targeted population                                             | Smart device      | Pain assessment method | App assessment                                                     |
|----------------------------------------------------------------------------|---------------------------------------------|-----------------------------------------------------------------|-------------------|------------------------|--------------------------------------------------------------------|
| Peters et al., 2000 [14]                                                   | Unexplained pain                            | Adults                                                          | PDA               | Not reported           | Not reported                                                       |
| Jamison et al., 2002 [16]                                                  | Healthy volunteers                          | Adults                                                          | PDA               | Not reported           | Not reported                                                       |
| Walker et al., 2002 [17]                                                   | Gastrointestinal pain                       | Children (6–10 years old)                                       | PDA               | Not reported           | Patients                                                           |
| Goldstein et al., 2003 [18]                                                | Post-operative pain, Hernia                 | Adults                                                          | PDA               | Not reported           | Not reported                                                       |
| Stone et al., 2003 [19]                                                    | Chronic Pain                                | Adults                                                          | PDA               | Not reported           | Patients                                                           |
| VanDenKerkhof et al., 2003 [20]                                            | Acute Pain                                  | Adults                                                          | PDA               | Not reported           | Patients                                                           |
| Chan et al., 2004 [21]                                                     | Acute Pain                                  | Adults                                                          | PDA               | Not reported           | Patients                                                           |
| Gaertner et al., 2004 [22]                                                 | Cancer pain                                 | Adults                                                          | PDA               | Not reported           | Patients                                                           |
| Palermo et al., 2004 [23]                                                  | Headaches and Juvenile Idiopathic Arthritis | Children and adolescents (8–16 years old)                       | PDA               | Not reported           | Patients                                                           |
| Serif and Ghinea, 2005 [25]                                                | Chronic back pain                           | 27–65 years, both male and female, literacy level not mentioned | PDA               | Dynamic & Standard     | Patients/HCPs (questionnaires)                                     |
| Kearney et. al., 2006 [28]                                                 | Cancer pain                                 | 24–77 years, both male and female                               | handheld computer | Static & Standard      | Patients/HCPs (questionnaire, interview, software log of activity) |
| Aaron et al., 2005 [26], Aaron et al., 2006 [26], Turner et al., 2005 [27] | Chronic temporo-mandibular pain             | Adults                                                          | PDA               | Not reported           | Not reported                                                       |
| Jamison et al., 2001 [15], Jamison et al., 2006 [30]                       | Chronic low-back pain                       | Adults                                                          | PDA               | Not reported           | Not reported                                                       |

|                                                                                       |                                                   |                                                                 |           |                    |                                           |
|---------------------------------------------------------------------------------------|---------------------------------------------------|-----------------------------------------------------------------|-----------|--------------------|-------------------------------------------|
| Roelofs et al., 2004 [24],<br>Roelofs et al., 2006 [31]                               | Chronic low-back pain                             | Adults                                                          | PDA       | Not reported       | Patients                                  |
| Sorbi et al., 2006 [32], Sorbi et al., 2006 [33]                                      | Chronic pain                                      | Adults                                                          | PDA       | Not reported       | Patients                                  |
| Sorbi et al., 2007 [35], Sorbi et al., 2010 [48]                                      | Chronic migraine                                  | 34-52 years females                                             | PDA       | Static & Standard  | Patients<br>(questionnaire and interview) |
| Evans et al., 2007 [36]                                                               | HIV-associated sensory neuropathies (HIV-SN)      | Adults                                                          | PDA       | Not reported       | Patients                                  |
| Goldberg et al., 2007 [37]                                                            | Menstrually related headache                      | Adult females                                                   | PDA       | Not reported       | Patients                                  |
| Heiberg et al., 2007 [38]                                                             | Rheumatoid arthritis                              | Adults                                                          | PDA       | Not reported       | Patients                                  |
| Ghinea et al., 2008 [39]                                                              | Back pain                                         | Adults                                                          | PDA       | Not reported       | Patients/HCPs                             |
| Junker et al., 2008 [40]                                                              | Chronic pain                                      | Adults                                                          | PDA       | Not reported       | Not reported                              |
| Stinson et al., 2006 [34],<br>Stinson et al., 2008 [41],<br>Stinson et al., 2008 [42] | Chronic pain of juvenile idiopathic arthritis     | Children and adolescents 9-18 years, both male and female       | PDA       | Dynamic & Standard | Patients<br>(think aloud, interview)      |
| Anatchkova, et. al., 2009 [43]                                                        | Chronic Pain                                      | >=18 years, both male and female                                | Tablet PC | Static & Standard  | Patients<br>(questionnaire)               |
| McClellan et al., 2009 [44]                                                           | Chronic vaso-occlusive pain (sickle cell disease) | Children and adolescents (8–20 years old), both male and female | PDA       | Static & Standard  | Patients / Care takers<br>(questionnaire) |
| Gulur et al., 2009 [45]                                                               | Acute pain                                        | Children and adolescents (3–17 years old)                       | PDA       | Not reported       | Patients                                  |
| Lewandowski et al., 2009 [46]                                                         | Chronic pain                                      | Children and adolescents (8–16 years old)                       | PDA       | Not reported       | Patients                                  |
| Kleiboer et al., 2009 [47]                                                            | Migraine headache                                 | Adult females                                                   | PDA       | Not reported       | Patients                                  |



|                                                            |                                                         |                                                                  |                                  |                   |                                                     |
|------------------------------------------------------------|---------------------------------------------------------|------------------------------------------------------------------|----------------------------------|-------------------|-----------------------------------------------------|
| Hachizuka et al., 2010 [49]                                | Cancer pain                                             | >=20 years, both males and females                               | PDA                              | Static & Standard | Patients (interview)                                |
| Luckmann and Vidal, 2010 [50]                              | Non-cancer chronic pain                                 | not specified                                                    | PDA                              | Static & Standard | Patients (notes, discussion)                        |
| Alfvén 2010 [51]                                           | Chronic pain                                            | Children and adolescents (9–15 years old)                        | SMS                              | Not reported      | Patients                                            |
| Connelly et al., 2010 [52]                                 | Headaches                                               | Children and adolescents (8–17 years old)                        | PDA                              | Not reported      | Patients                                            |
| Marceau et al., 2010 [54]                                  | Non-cancer chronic pain                                 | Adults                                                           | PDA                              | Not reported      | Patients/HCPs                                       |
| Rosser et al., 2011 [57],<br>Rosser and Eccleston 2011 [6] | Chronic pain                                            | Both male and female                                             | Smartphone                       | Static & Standard | Not reported                                        |
| Wood et al., 2011 [58]                                     | Postoperative disease-related pain                      | Children (4–12 years old)                                        | PDA                              | Not reported      | Patients                                            |
| Baggott et al., 2012 [60]                                  | Cancer pain                                             | 13-21 years, both male and female                                | Smartphone (iOS)                 | Static & Standard | Patients (questionnaire, think-aloud and interview) |
| Spyridonis et al., 2012 [62]                               | Musculoskeletal pain (body pain in wheelchair patients) | >=18 years, both male and female                                 | Smartphone and tablets (android) | Static & Standard | Patients (questionnaire)                            |
| Allena et al., 2012 [59]                                   | Headaches                                               | Adults                                                           | PDA                              | Not reported      | Patients                                            |
| Connelly et al., 2010 [53],<br>Connelly et al., 2011 [55]  | Juvenile Idiopathic Arthritis                           | Adolescents (8–18 years old)                                     | Smartphone                       | Not reported      | Patients                                            |
| Jacob et al., 2012 [63], Jacob et al., 2013 [64]           | Chronic pain in sickle cell disease                     | Children and adolescents (10–17 years old), both male and female | Smartphone                       | Static & Standard | Patients                                            |
| Nes et al., 2013 [65]                                      | Chronic widespread musculoskeletal pain                 | Female, age not specified                                        | PDA / Smartphone                 | Static & Standard | Patients (questionnaire, interview)                 |

|                                                                                                               |                                                   |                                                    |                           |                               |                                                         |
|---------------------------------------------------------------------------------------------------------------|---------------------------------------------------|----------------------------------------------------|---------------------------|-------------------------------|---------------------------------------------------------|
| Stinson et al., 2013 [66]                                                                                     | Cancer pain                                       | 9-18 years, both male and female                   | Smartphone (iOS)          | Static & partially customized | Patients (interviews, questionnaire)                    |
| Jibb et al., 2012 [61]                                                                                        | Cancer pain                                       | Children and adolescents (8–18 years old)          | Smartphone (iOS)          | Not reported                  | Patients                                                |
| Kristjánsdóttir et al., 2011 [56],<br>Kristjánsdóttir et al., 2013 [67],<br>Kristjánsdóttir et al., 2013 [68] | Chronic widespread pain                           | Adults                                             | Smartphone                | Not reported                  | Patients                                                |
| Blödt et al., 2014 [69]                                                                                       | Chronic Low Back Pain - Chronic Neck Pain         | 18 to 65 years, gender not specified               | Smartphone                | Static & Standard             | Not reported                                            |
| Garcia-Palacios et al., 2014 [70]                                                                             | Chronic pain in fibromyalgia                      | 37-65 years, female                                | Smartphone (Win mobile)   | Static & Customized           | Patients (questionnaire)                                |
| Jibb et al., 2014 [71]                                                                                        | Pediatric cancer pain                             | 12-18 years, both male and female                  | Smartphone (iOS)          | Static & Standard             | HCPs / adolescents (interviews)                         |
| Pombo et al., 2014 [72]                                                                                       | Acute post- operative pain                        | 18–75 years, both male and female                  | Smartphone                | Static & Standard             | Patients (questionnaire)                                |
| Bakshi et al., 2015 [73]                                                                                      | Vaso- occlusive pain - sickle cell disease        | Adolescents and Young Adults, both male and female | Smartphone                | Static & Standard             | Experts/Patients (observation & field notes, interview) |
| Huguet et al., 2015 [74]                                                                                      | Headache                                          | 14-28 years, both male and female                  | Smartphone (iOS)          | Static & Standard             | Patients (questionnaire, interview)                     |
| Jonassaint et al., 2015 [75]                                                                                  | Chronic vaso-occlusive pain (sickle cell disease) | 16–54 years, both male and female                  | Smartphone – Tablet (iOS) | Dynamic & Customized          | Patients (interview)                                    |
| Maguire et al., 2015 [76]                                                                                     | Lung Cancer Pain                                  | >=18 years, both male and female                   | Smartphone                | Static & Customized           | Patients / HCPs (interview, questionnaire)              |
| Nguyen et al., 2015 [77]                                                                                      | Dysmenorrhea pelvic pain                          | 14–50 years, female                                | PDA                       | Static & Standard             | Patients (think-aloud, interviews)                      |

|                                |                      |                                         |                    |                    |                                                              |
|--------------------------------|----------------------|-----------------------------------------|--------------------|--------------------|--------------------------------------------------------------|
| Fortier et al., 2016 [78]      | Cancer pain          | 8-18 years, both male and female        | TabletPC (Android) | Static & Standard  | Patients (questionnaire)                                     |
| Hochstenbach et al., 2016 [79] | Cancer pain          | Age not specified, both male and female | Tablet (iOS)       | Static & Standard  | Experts/HCPs/Patients                                        |
| Ingadottir et al., 2017 [80]   | Post- operative pain | >=18 years, both male and female        | TabletPC (Android) | Static & Standard  | Patients (questionnaire, interview, focus group, discussion) |
| Jibb et al., 2017 [81]         | Cancer pain          | 12-18 years, both male and female       | Smartphone (iOS)   | Dynamic & Standard | Patients (observation, think-aloud, interview)               |

**Table S6.** Selected papers and review results #2

| Method      | Description                                           | Percentage |
|-------------|-------------------------------------------------------|------------|
| ASK         | Activity Scale for Kids                               | 2%         |
| CEMS        | Children's Emotion Management Scale                   | 2%         |
| CES-D       | Center for Epidemiological Studies - Depression Scale | 2%         |
| CSQ         | Coping Strategies Questionnaire                       | 2%         |
| FBP-RS      | Faced Based Pictorial - Rating Scale                  | 2%         |
| FPS / FPS-R | Faces Pain Scale / Faces Pain Scale – Revised         | 4%         |
| GPS         | Gracely Pain Scale                                    | 2%         |
| LIKERT      | LIKERT scale                                          | 2%         |
| LO          | List of Options                                       | 9%         |
| MCQs        | Multiple Scale Questions                              | 21%        |
| mHAQ        | modified Health Assessment Questionnaire              | 2%         |
| MIDOS       | MInimal DOcumentation System                          | 2%         |
| MPI         | Multidimensional Pain Inventory                       | 2%         |
| NRS         | Numeric Rating Scale                                  | 16%        |
| OA          | Open Answers                                          | 13%        |
| PAD         | Pain And Distress ratings                             | 2%         |
| PANAS-C     | Positive And Negative Affect Scale - for Children     | 4%         |
| PCS         | Pain Catastrophizing Scale                            | 2%         |
| PD          | Pain Drawing                                          | 20%        |
| PD-Q        | Pain DETECT - Questionnaire                           | 2%         |
| SPS         | Standard Pain Scoring                                 | 23%        |
| VAS         | Visual Analog Scale                                   | 27%        |
| VRS         | Verbal Rating Scale                                   | 2%         |

**Table S7.** Pain measurement instruments and techniques

| App Name                                      | Developer                                   | Price             | Category         | Store      | Devices      | Pain problem (condition)                                                        |
|-----------------------------------------------|---------------------------------------------|-------------------|------------------|------------|--------------|---------------------------------------------------------------------------------|
| AccuRelief 3-in-1 Pain Relief                 | Compass Health Brands                       | Free              | Medical          | US         | iPhone       | Pain                                                                            |
| ACPA Pain Logs                                | The American Chronic Pain Association, Inc. | Free              | Health & Fitness | US, UK, CA | iPhone, iPad | Pain                                                                            |
| Back to Health                                |                                             | Free              | Health & Fitness | UK         | iPhone, iPad | Back pain                                                                       |
| Chronic Pain Diary                            | Ben Delaporte                               | Free              | Medical          | US, UK, CA | iPhone       | Pain                                                                            |
| Chronic Pain Diary Lite                       | Ben Delaporte                               | Free              | Medical          | US, UK, CA | iPhone       | Pain                                                                            |
| Chronic Pain Tracker                          | Chronic Stimulation, LLC                    | \$6,99/Lite: free | Medical          | US, UK, CA | iPad, iPhone | Pain                                                                            |
| EPM - Essential Pain Management               | Qworks Technologies Pvt Ltd                 | Free              | Medical          | US, UK     | iPhone       | Pain                                                                            |
| HeadacheDiary - Lite                          | Tim Preuss                                  | Free              | Health & Fitness | UK, CA     | iPhone       | Headache                                                                        |
| iBeatPain for Teens                           | Take The Wind, Lda.                         | Free              | Health & Fitness | US         | iPhone       | Pain                                                                            |
| iMigraine - migraine tracker                  | Softarch Technologies AS                    | Free              | Medical          | US, UK, CA | iPad, iPhone | Migraine                                                                        |
| iPain                                         | Anouk Stein, M.D.                           | Free              | Medical          | CA         | iPhone       | Pain                                                                            |
| Manage My Pain                                | ManagingLife                                | Free              | Medical          | US, UK, CA | iPad, iPhone | Pain                                                                            |
| Migraine Buddy                                | Healint                                     | Free              | Medical          | US, UK, CA | iPad, iPhone | Migraine                                                                        |
| My Pain Diary & Symptom Tracker: Gold Edition | Damon Lynn                                  | \$ 4,99           | Medical          | US,UK, CA  | iPad, iPhone | Allergies, back pain, chronic fatigue syndrome (CFS), depression, fibromyalgia, |

|                                                |                                     |         |                  |            |              |                           |
|------------------------------------------------|-------------------------------------|---------|------------------|------------|--------------|---------------------------|
|                                                |                                     |         |                  |            |              | headaches, or<br>migraine |
| My Pain Diary: Chronic Pain & Symptom Tracker  | Damon Lynn                          | \$ 4,99 | Medical          | US,UK, CA  | iPhone       | Pain                      |
| My Pain Log                                    | Samantha Roobol                     | Free    | Medical          | US, UK, CA | iPad, iPhone | Pain                      |
| My Pain Logs                                   | Subinprara Infotech Inc.            | Free    | Medical          | US, UK, CA | iPad, iPhone | Pain                      |
| Pain App                                       | University of Greenwich             | Free    | Medical          | US, UK     | iPad, iPhone | Pain                      |
| Pain Care App                                  | appliedVR                           | Free    | Health & Fitness | US         | iPhone, iPad | Pain                      |
| Pain Management Plan                           | Advanced Digital Institute - Health | free    | Medical          | UK         | iPhone       | Pain                      |
| Pain Management pocketcards                    | Börm Bruckmeier Publishing LLC      | \$4,99  | Medical          | US, UK, CA | iPad, iPhone | Pain                      |
| Pain Pal: chronic pain control                 | ZenZone Interactive Limited         | \$ 1,99 | Medical          | US         | iPad, iPhone | Pain                      |
| Pain Scale - your digital log for chronic pain | odeesoft                            | \$ 5,99 | Medical          | US         | iPad, iPhone | Pain                      |
| Pain Scored                                    | PATIENT PREMIER, LLC                | Free    | Medical          | US, CA     | iPad, iPhone | Pain                      |
| Pain Squad                                     | The Hospital for Sick Children      | Free    | Medical          | US, UK, CA | iPhone       | Pain                      |
| Pain Toolkit                                   | Advanced Digital Institute - Health | Free    | Medical          | US, UK, CA | iPad, iPhone | Pain                      |
| Pain Tracker                                   | Terry Billingsley                   | Free    | Health & Fitness | US         | iPhone, iPad | Pain                      |
| Pain Tracker & Diary                           | Nanolume, LLC                       | \$2,99  | Medical          | US         | iPad, iPhone | Pain                      |

|                                                 |                                         |            |                  |            |              |                      |
|-------------------------------------------------|-----------------------------------------|------------|------------------|------------|--------------|----------------------|
| Pain-Scale                                      | BGU Medical Informatics Research Center | Free       | Health & Fitness | US         | iPhone       | Pain                 |
| PainPoint – Prevent Work Injury                 | www.ohcow.on.ca                         | Free       | Health & Fitness | US         | iPad, iPhone | Pain                 |
| PainScale - Pain Tracker Diary                  | Boston Scientific                       | Free       | Medical          | US         | iPhone       | Pain                 |
| PainTrakr                                       | Black Slate Software Inc.               | Free       | Medical          | US, UK, CA | iPad, iPhone | Pain                 |
| RheumaBuddy                                     | Daman P/S                               | Free       | Medical          | UK         | iPhone       | Rheumatoid arthritis |
| Signs & Symptoms Low Back Pain                  | BuiltByDoctors                          | Free       | Medical          | US         | iPad, iPhone | Low back pain        |
| Symdir - symptom diary made easy                | SILECI                                  | Free       | Medical          | CA         | iPad, iPhone | Pain                 |
| Symple Symptom Tracker                          | Symple Health, Inc.                     | Free       | Medical          | US, UK, UK | iPhone       | Pain                 |
| Symptom Diary                                   | Stuart Harris                           | Free       | Medical          | UK         | iPhone       | Pain                 |
| Symptom Tracker by TracknShare                  | Track & Share Apps, LLC                 | \$ 6,99 CA | Medical          | CA         | iPad, iPhone | Pain                 |
| Symptom Tracker: Pain Headache                  | Telemedhome,LLC                         | Free       | Health & Fitness | US, CA     | iPhone, iPad | Headache             |
| Symptom Tracker: Pain History                   | SmoothMobile, LLC                       | Free       | Health & Fitness | US         | iPhone       | Pain                 |
| Track My Pain                                   | Paul Brungardt                          | Free       | Health & Fitness | US         | iPhone       | Pain                 |
| TRACK + REACT                                   | Arthritis Foundation                    | Free       | Health & Fitness | UK, CA     | iPhone       | Pain                 |
| TracknShare LITE                                | Track & Share Apps, LLC                 | Free       | Medical          | US, UK, CA | iPad, iPhone | Pain                 |
| Visual Scale (painometer, pain level measuring) | Bit Genoma Digital Solutions SL         | Free       | Medical          | US, UK, CA | iPad, iPhone | Pain                 |

**Table S8.** Pain apps available in AppStore for iOS (Vionza)



| App Name                                           | Developer                                  | Pain problem (condition)  |
|----------------------------------------------------|--------------------------------------------|---------------------------|
| Back Pain Tracker                                  | PEERClinic for Back Pain and Spine Surgery | Back pain                 |
| Essential Pain Management                          | Qworks Technologies Pvt Ltd                | Pain                      |
| FibroMapp Pain Manager +                           | Bodymap Apps                               | Fibromyalgia              |
| Manage My Pain                                     | ManagingLife                               | Pain                      |
| Manage My Pain Pro                                 | ManagingLife                               | Pain                      |
| Migraine Buddy - The Migraine and Headache tracker | Healint                                    | Migraine and Headache     |
| My Pain Diary                                      | DamoLab LLC                                | Pain                      |
| Ouchie: your pain management companion             | Ouchie                                     | Pain                      |
| Pain Assessment Tool for children                  | Bcom                                       | Pain                      |
| Pain Companion                                     | Sanovation AG                              | Pain                      |
| Pain Diary - Pain Management Log                   | Stay fit with Samantha                     | Pain                      |
| Pain Diary (Privacy Friendly)                      | SECUSO Research Group                      | Pain                      |
| Pain Diary & Forum CatchMyPain                     | Sanovation AG                              | Pain                      |
| Pain Log                                           | Raul R.                                    | Pain                      |
| Pain Log - Pain Tracker                            | Skilllo Apps                               | Pain                      |
| Pain Scale VAS                                     |                                            | Pain                      |
| Pain Scored                                        | Patient Premier                            | Pain                      |
| Pain Tracker & Diary                               | Nanonlume LLC                              | Pain                      |
| Pain Tracker HD                                    | AppYourWay                                 | Pain                      |
| PainScale - Free Chronic Pain Tracker Diary        | Boston Scientific Inc                      | Pain                      |
| Track My Pain                                      | King Louie Apps                            | Pain                      |
| WebMD: Check Symptoms, Find Doctors, & Rx Savings  | WebMD LLC                                  | Various health conditions |

**Table S9.** Pain apps available in Google Play for Android

| App Name                     | Developer                                                                                                                                                                                | Country        | Language                                                          | Platforms         | Price                                                  | Condition               |
|------------------------------|------------------------------------------------------------------------------------------------------------------------------------------------------------------------------------------|----------------|-------------------------------------------------------------------|-------------------|--------------------------------------------------------|-------------------------|
| CatchMyPain-Pain Diary       | Sanovation AG; Software Evolution and Architecture Lab (SEAL) Gruppe, Instituts für Informatik, Universität Zürich ( <a href="http://www.sanovation.com">http://www.sanovation.com</a> ) | Switzerland    | English, French, German, Spanish                                  | Android, iOS, web | Free. Various in app purchases                         | Pain                    |
| FMAUKFibroMapp               | BodyMap Apps, UK<br><a href="http://www.bodymapapps.com">http://www.bodymapapps.com</a>                                                                                                  | United Kingdom | English                                                           | Android, iOS      | £2,99                                                  | Fibromyalgia.           |
| Headache Diary (ecoHeadache) | ecoTouchMedia (Jae-Ung Yi)                                                                                                                                                               | Germany        | English / French / German / Italian / Japanese / Korean / Spanish | iOS, web          | £1.91                                                  | Headache                |
| Headache Diary Lite          | Froggyware GmbH<br><a href="http://www.froggyware.com">http://www.froggyware.com</a>                                                                                                     | Germany        | English / French / German / Italian / Spanish                     | Android, web      | Lite version free, Android full version: £1.99         | Headaches or migraines. |
| iheadache                    | BetterQOL.com, USA<br><a href="http://www.betterqol.com">http://www.betterqol.com</a>                                                                                                    | United States  | English                                                           | iOS, web          | Lite' version free on Apple; Apple full version: £3.20 | Headache                |
| Manage My Pain Lite          | ManagingLife<br><a href="http://www.managinglife.com">http://www.managinglife.com</a>                                                                                                    | Canada         | English                                                           | Android, web      | Free, Pro version £2.99                                | Pain.                   |

|                                        |                                                                                                                                                                                                                                                                                                                     |               |                                               |              |       |                                   |
|----------------------------------------|---------------------------------------------------------------------------------------------------------------------------------------------------------------------------------------------------------------------------------------------------------------------------------------------------------------------|---------------|-----------------------------------------------|--------------|-------|-----------------------------------|
| My Pain Diary: Chronic Pain Management | Damon Lynn, USA<br><a href="http://www.damonlynn.com">http://www.damonlynn.com</a>                                                                                                                                                                                                                                  | United States | English                                       | iOS          | £3.99 | Pain                              |
| myIBD                                  | Karen Frost; Dr. Johan Van Limbergen; Meaghan Wright (and Ritchie Hwang), Canada<br><a href="http://www.sickkids.ca/AboutSickKids/Newsroom/Past-News/2011/SickKids-mobile-app-helps-IBD-patients.html">http://www.sickkids.ca/AboutSickKids/Newsroom/Past-News/2011/SickKids-mobile-app-helps-IBD-patients.html</a> | Canada        | English                                       | iOS, web     | Free  | Inflammatory Bowel Disease (IBD). |
| Pain Care                              | Ringful Health, USA<br><a href="http://www.ringfulhealth.com">http://www.ringfulhealth.com</a>                                                                                                                                                                                                                      | United States | English                                       | Android, iOS | Free  | Chronic pain or sports injuries.  |
| RheumaTrack                            | Nicole Derouaux of Mutterelbe Medical UG, Germany<br><a href="http://www.mutterelbe.de">http://www.mutterelbe.de</a>                                                                                                                                                                                                | Germany       | English / French / German / Spanish / Turkish | Android, iOS | Free  | Rheumatism                        |
| SmallTalk Intensive Care               | Lingraphicare America Inc, USA<br><a href="http://www.aphasia.com">http://www.aphasia.com</a>                                                                                                                                                                                                                       | United States | English                                       | iOS, web     | Free  | Pain                              |
| SmallTalk Pain Scale                   | Lingraphicare America Inc, USA<br><a href="http://www.aphasia.com">http://www.aphasia.com</a>                                                                                                                                                                                                                       | United States | English                                       | iOS          | Free  | Pain                              |
| WebMD                                  | WebMD LLC, USA<br><a href="http://www.webmd.com/mobile">http://www.webmd.com/mobile</a>                                                                                                                                                                                                                             | United States | English                                       | Android, iOS | Free  | Pain                              |

**Table S10.** Pain apps reported in myhealthapps.net

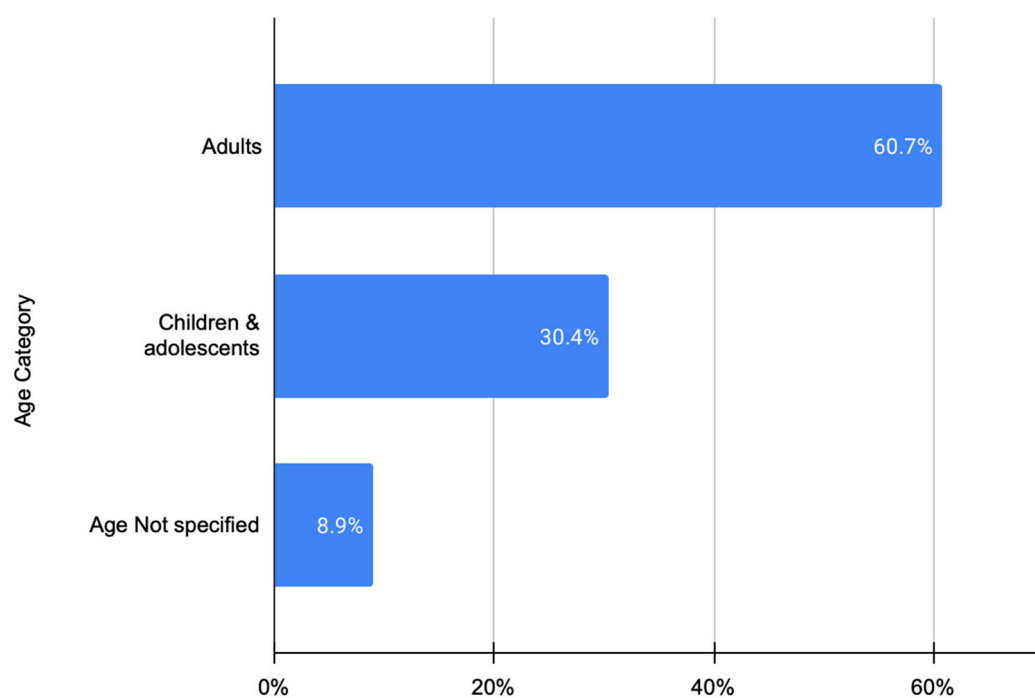

**Figure S1.** Target population (age) for selected articles

## Target population

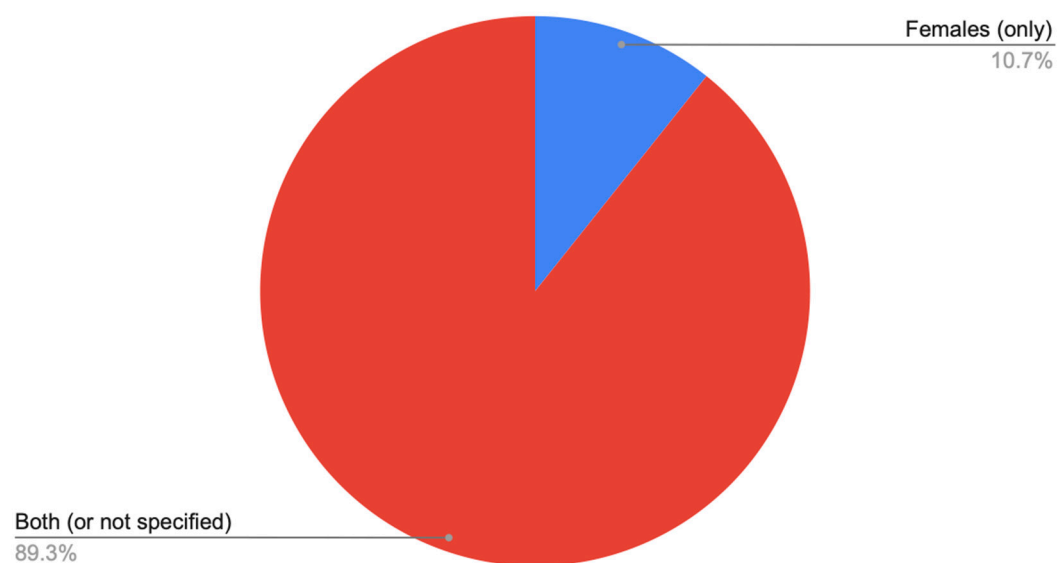

**Figure S2.** Target population (gender) for selected articles

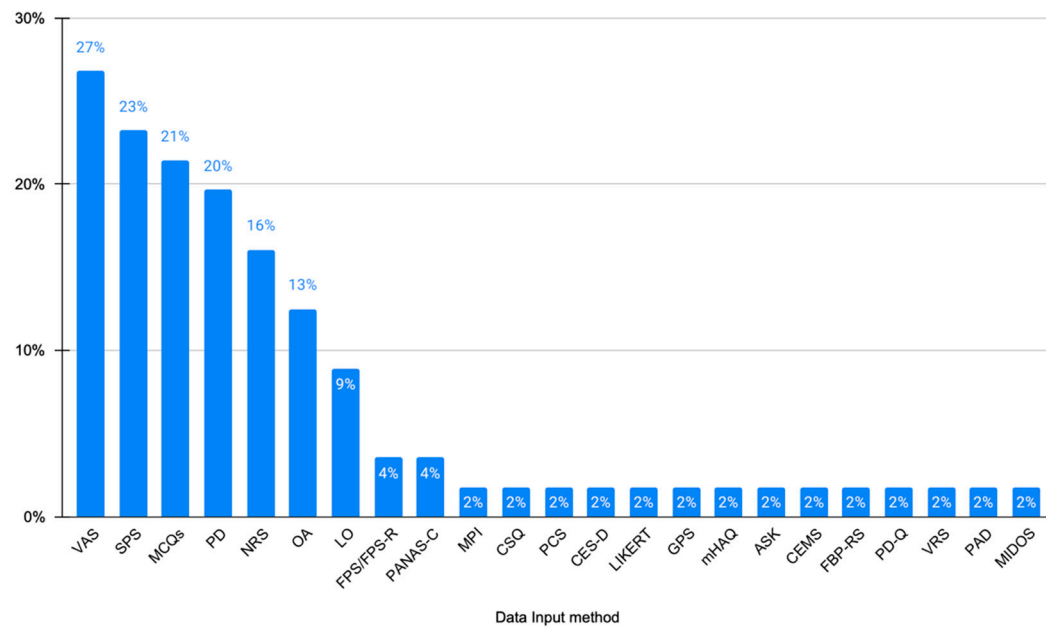

**Figure S3.** Data input method for pain assessment (articles)

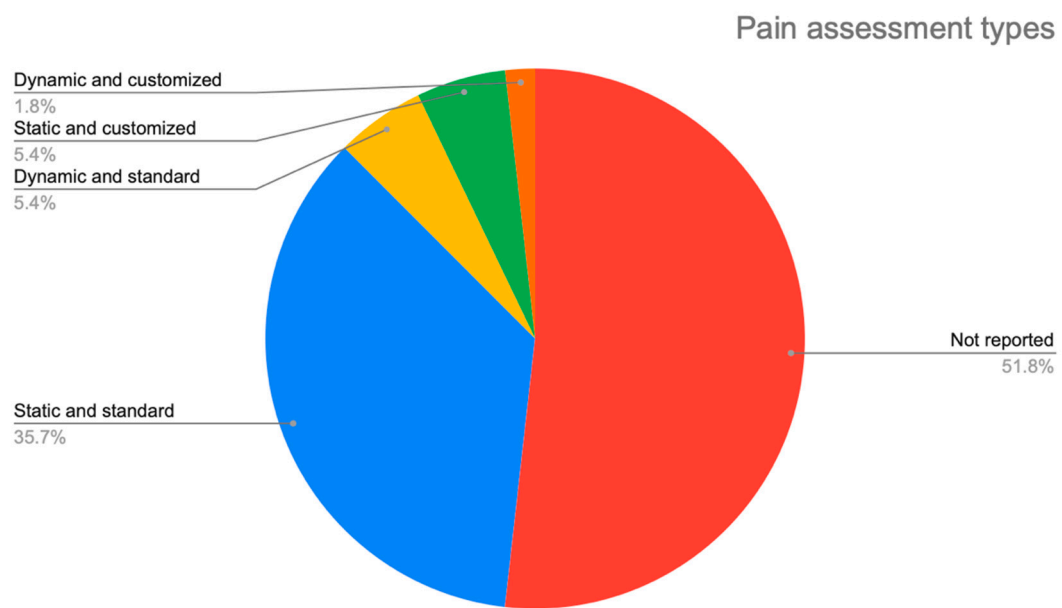

**Figure S4.** Types of pain assessment (articles)

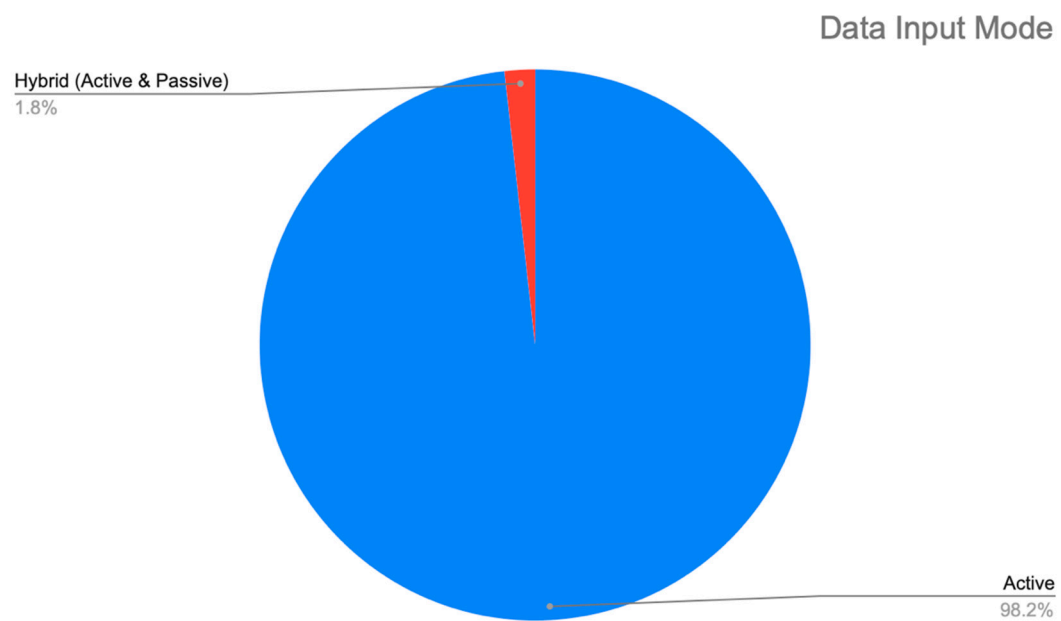

**Figure S5.** Types of data input mode (articles)



### Subjective evaluation methods

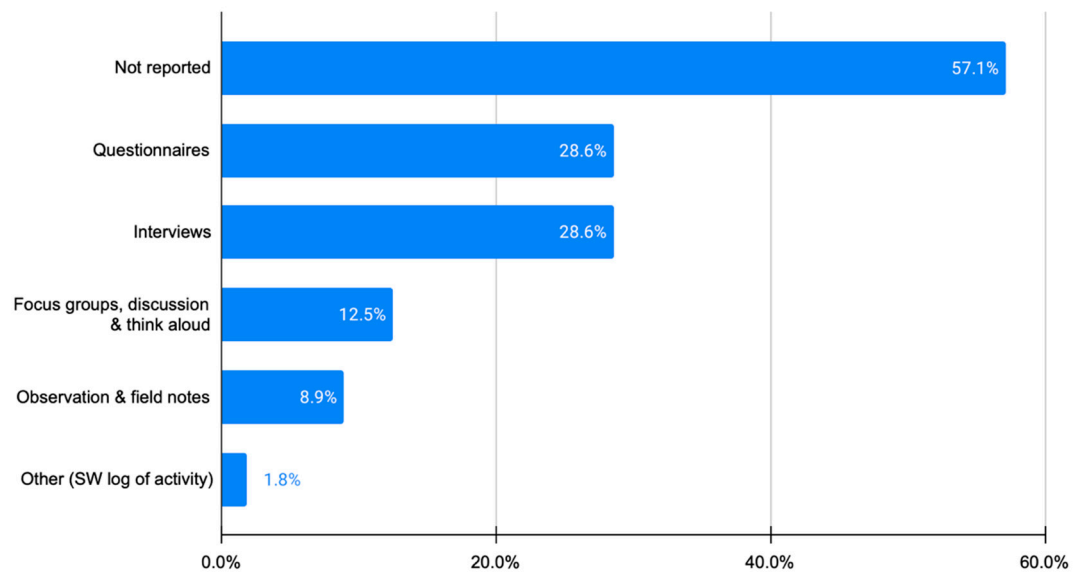

**Figure S6.** Subjective evaluation methods (articles)

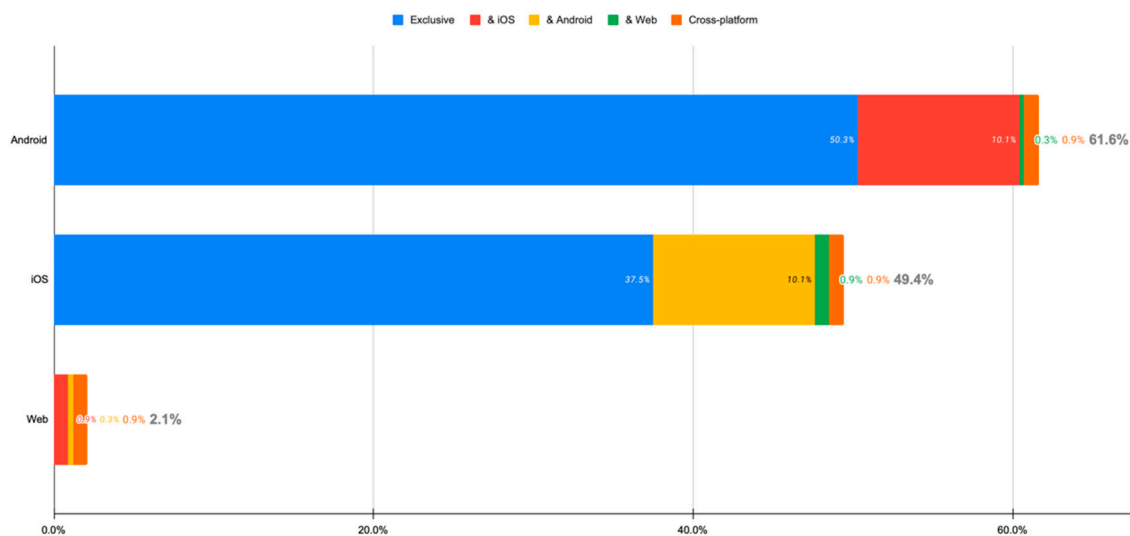

**Figure S7.** Target platform for commercial pain management apps

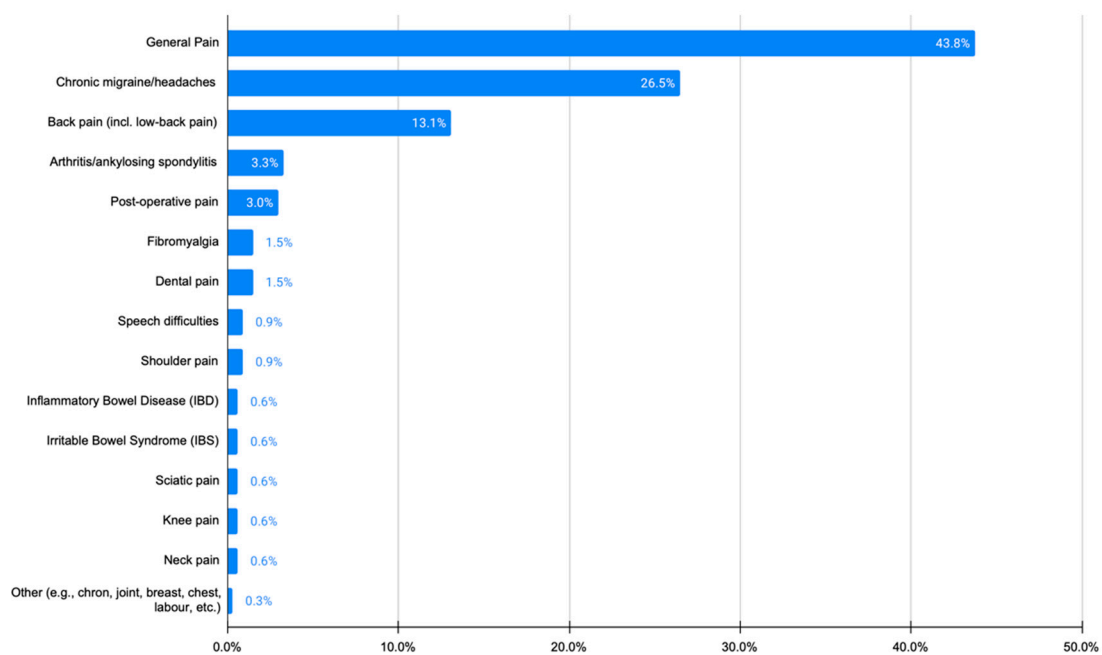

**Figure S8.** Target condition or pain type for commercial pain management apps

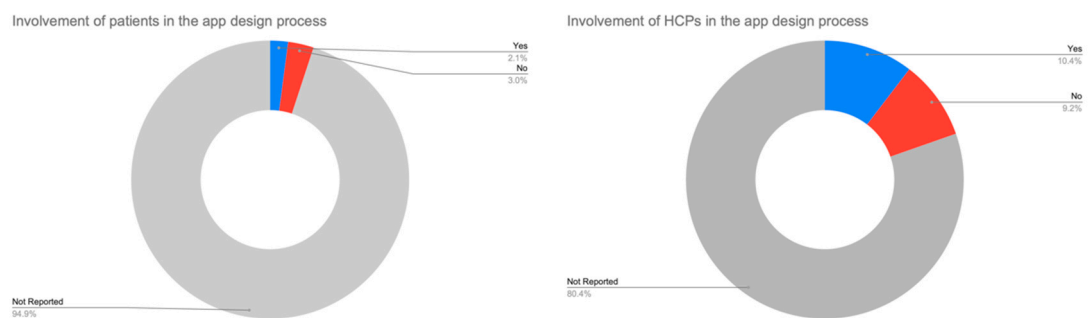

**Figure S9.** Design methodology for commercial pain management apps
