# Supplementary material for: Pain Management Mobile Applications: A Systematic Review of Commercial and Research Efforts
Source: Sensors (Basel). 2023 Aug 5;23(15):6965. doi: 10.3390/s23156965 (PMC10422642; doi:10.3390/s23156965)
Supplement: Supplementary file 1 [file sensors-23-06965-s001.zip › Appendix B.xlsx]

## Sheet: Commercial Pain Apps
Name	Developer	Country	Language	Platfrom	Price	User rating	Pain problem (condition)	Description (as provided by the developers)	Features	HCP Involvement in Design	Patient Involvement in Design	Support	Category	Store	Last Update
250 Pain With Treatment	Uniqueapp		English	Android			pain
A Migraine Diary for You				iOS, android	4,99 ($ can)		Headache		Export data from app
AccuRelief 3-in-1 Pain Relief	Compass Health Brands		English	iOS	Free	3	pain	The AccuRelief Wireless 3-in-1 Pain Relief Device provides TENS, EMS and Massage treatments with the option of using a handheld remote or mobile device. Surround your pain with two electrodes and up to 60 levels of intensity. Treat a wide variety of areas on the body by simply touching the area on your screen and placing the electrodes around the area you wish to treat. The built-in electrode pla…					Medical	US	2017-05-24
Ache Break	Lita Van Wagenen		English	iOS			pain
Ache relief	S Liu		English	iOS			pain
ACPA Pain Logs	The American Chronic Pain Association, Inc.	USA	English	iOS, android	Free	No rating	pain	Dealing with chronic pain can be difficult and many things can affect your pain. The American Chronic Pain Association Pain Logs App can help you track the everyday habits and activities that impact your pain or opioid induced constipation (OIC) you may be experiencing. The ACPA Pain Logs App was created by the American Chronic Pain Association to track, manage, and report on pain and OIC symptom…		X (systematic)			Health & Fitness	US, UK, CA	2016-01-04
Activity Heals 1on1	Elevenity			android		2.3	Postoperative pain		education (postop pain)	No	No
Acuapp	Maitri Hillebrecht		English	android			pain
Acupresión Dolor De Cabeza	Alchemy		English, Italian, French, German, Norwegian, Russian, Spanish	android			pain
Acupressure: Treat Yourself	Alexander Mokrushin		English, Spanish	iOS, android			pain
Acupuncture For Aches	Appzdepo		English	android			pain
Afa-MICI	Franck Touboul, Ylly	France	Czech, Dutch, English, French, German, Italian, Japanese, Korean, Polish, Portuguese, Russian, Simplified Chinese, Spanish, Swedish, Traditional Chinese, Turkish	iOS	Free	5	Inflammatory bowel disease (IBD),	Provides information on inflammatory bowel disease (IBD), dieticians and hospitals, and on the activities of France-based patient group, Association Francois Aupetit (AFA). Contains a lavatory finder, allowing the user to also input the location of facilities not on the existing database. Provides access to AFA forum posts.	Allows networking with other patients / Family / Friends/Information			Created by: Association François Aupetit (AFA), France
AGMethod	Cristiano Campanella		English	iOS			pain
Alivia las contracturas	Sebastian Chab		Spanish	iOS			pain
Aliviar Los Dolores De Espalda	Tap Coder		Spanish	android			pain
American Migraine Foundation				iOS	Free		Headache		Export data from app	Yes
Analgesia Práctica	Upcb Apps		Spanish	android			pain
Analgesia Pràctica	Juan Pablo Burgu		Spanish	iOS			pain
Aps SmartCal	Meed Comunicación SL,	Spain	Spanish	iOS	Free	5	Psoriatic Arthritis	This application put together several indices for the assessment of psoriatic arthritis: PASI, DAS28, BASDAI, BASFI, pain scales and HAQ-20 to offer the rheumatologist a tool to track the overall evolution of the patient over time.	Information, Patient monitoring			Created by: Dr. Raquel Almodóvar, MD, Rheumatology service, “Fundación Alcorcón” Hospital
Aptitud Del Dolor De Espalda	Playcorp		French	android			pain
Arthritis Joint Pain Handbook	Dhruvi		English	android			arthritis
Arthritis Joint Pain Relief	Koolappz		English	android			arthritis
ArthritisID	ACE Planning and Consulting Inc,	Canada	English, French	iOS	free	4.5	Some arthritis types: Ankylosing Spondylitis, Gout, Juvenile Idiopathic Arthritis, Lupus, Osteoarthritis, Psoriatic Arthritis, and Rheumatoid Arthritis.	Contains information on detecting, treating and managing arthritis. Information on the prevention of arthritis includes facts about exercise, diet and nutrition. Treatment strategies and details about medication are discussed. An interactive arthritis screening tool and questionnaire helps the user detect indications of arthritis. Personal information about arthritis can be saved.	Information Support to deal with symptoms/disabilities			Created by: Arthritis Consumer Experts (ACE), Canada, Recommended by: Arthritis New Zealand Canadian Spondylitis Association A Group Representing patients who suffer from Rheumatological problems, Canada
Artrosis	Pcr Aurope		Spanish	android			pain
Aspirina Virtual	Giovanni G		Spanish	android			pain
Aviación Extensiones	DawnSun Technologies LLC		Spanish	iOS			pain
Avoiding Back Pain	Quality Mrrsitd		English	android			back pain
Ayurveda Cures Remedies	Arpita Suroshe		English	android			pain
Back Exercises	Bigo		English	android			back pain
Back Pain	Dr. Gozna, Ortho Tech Inc	Canada	English	iOS, android	8·23$ 5·99€	Not rated	Low Back Pain	A course for both healthcare professionals and patients. In easily understandable language it explains current concepts regarding its cause and common contributors. It also presents a systematic approach to its diagnosis and management.	Information			Surgeon, Professional Biomedical Engineer
Back Pain	Bawidgets.Com		English	android			back pain
Back Pain	Nic		English	android			back pain
Back Pain Diagnosis	MatheMEDics, Inc	USA	English	android		5	Back Pain	By asking a series of questions about the back pain, the expert system will analyze the answers and provide a list of the most likely diagnoses in order of probability.	Diagnosis			Created by: Martin F. Sturman, MD, FACP Henry R. Sturman, M.Sc.Eng Richard N. Harner, M.D. Manuel Perez, Ph.D. Paul J. Rosch, MD, FACP Jack Sizer, M.D., MBA Julie Brown Sturman, BFA, RN M. Elayne DeSimone, Ph.D., NP-C Joel M. Mynders, A.B. BC-HIS
Back Pain Guide	Wonderworlapps		English	android			back pain
Back Pain Guides	Renu Jain		English	android			back pain
Back Pain Massager	Apps Zenny		English	android			back pain
Back Pain Relief	Bigo		English	android			back pain
Back Pain Relief	Mordevz		English	android			back pain
Back Pain Relief (Backpain The Natural Way)	Arweebapps		Spanish	android			back pain
Back Pain Relief Guide	App Maniac		English	android			back pain
Back Pain Relief Guide 2013	Padhiyar		English	android			back pain
Back Pain Relief- Free	Better Health		English	android			back pain
Back Pain Remedies	Joliallc		English	android			back pain
Back Pain Solutions/Remedies	App Maniac		English	android			back pain
Back Pain Symptoms & Treatment	Bannerdock, Inc		English	android			back pain
Back Pain Tracker	PEERClinic for Back Pain and Spine Surgery		English	android	Free. Various in app purchases		back pain	The best treatment for one patient may be different from the one that works best on average. Guidelines and conventional decision aids provide average treatment effects and suggestions based on the average patient. However, each patient has unique characteristics that may affect benefits and risks. Back Pain Tracker is an interactive app that helps personalize treatment. Back pain is a major and …					Medical	US	2019-06-07
Back to Health			English	iOS	Free	4	back pain	This spinal health app is the brainchild of the one of UK's most experienced premium chiropractors. It is part of a suite of unique technology designed to help and empower people with back pain. The care is delivered by a unique blend of expert practitioners including Chiropractors, Osteopaths, Physiotherapists and Rehabilitation therapists, who work together, using their complementary skills to …					Health & Fitness	UK	2017-03-21
Bcx Eva Escala Dolor	Biocapax Technologies	Spain	Spanish	android	Free	4.3	Pain	It is intended for use as support for the daily activities of health care professionals and family caregivers who want to assess pain analogically.	Patient monitoring			Created by: Nursing council of the Valencian community
Bebesincolico	El Puericultor SLNE		Spanish	iOS			pain
Best Symptom Checker	Senstore-Powered By Harvard	USA	English	android	Free	4.6	Various types of pain: abdominal, chest, headache, etc.	Symptom checker which helps patients answer the question: "Do I need to see the doctor?"	Medical advice			Created by: Harvard Medical School
Body Pain Management Hypnosis	Grand Apps Studio	USA	English	android	Free	3.8	Pain intensity	Hypnosis audio	Support to deal with symptoms/disabilities			Created by: Elizabeth Harford, licensed UCM minister and certified hypnotherapist by the "The National Guild Of Hypnotists"
Breast Implant Exercises	Chicago Plastic Surgery			android		3.6	Postoperative pain		pain self-mgt tools	physician	No
BW MyTENS	Visiomed Lab			android		4.7	Postoperative pain		goal setting, education (postop pain)	No	No
CatchMyPain-Pain Diary	Sanovation AG; Software Evolution and Architecture Lab (SEAL) Gruppe, Instituts für Informatik, Universität Zürich http://www.sanovation.com/	Switzerland	English, French, German, Spanish	android, ios, web	Free. Various in app purchases		pain	A pain diary that allows the user to create colour-coded drawings of the location and intensity of the pain. Comments can be added. Details recorded include the time of the pain, the 'quality' of the pain (for example, sharp, or hot), and the user's overall happiness at the time of the pain. Graphs express the course of the pain's progression or withdrawal. The pain diary can be emailed to family…	Improving communication, Support to deal with symptoms/disabilities, Self-monitoring, Trackers, Information	Klinikien Valens, Klinik für Rheumatologie und internistische Rehabilitation, Universität Zürich, Switzerland
Chest Pain Diagnosis	MatheMEDics, Inc	USA	English	android	1·32$ 0·69€	5	Chest Pain	By asking a series of questions about chest pain, the expert system will analyze the answers and provide a list of the most likely diagnoses in order of probability.	Diagnosis			Created by: Elizabeth Harford, licensed UCM minister and certified hypnotherapist by the "The National Guild Of Hypnotists"
Chronic Pain Connects	Alliance Health Networks		English	android			pain
Chronic Pain Diary	Ben Delaporte	USA	English	iOS	Free	5	pain	Since 9/4/2017, Chronic Pain Diary is now free, to help as many people as possible. Chronic pain symptoms are tough. But tracking them should be easy. Chronic Pain Diary enables you to track your pain with symptoms and treatments, a color coded calendar, readable graphs, and quick and easy data entry. Export your graphs and calendar in an email, and forward all your data as a 'comma separated val…					Medical	US, UK, CA	2012-09-04
Chronic Pain Diary	Jet5	Scotland	english	android	Free		pain			X (systematic)
Chronic Pain Diary Lite	Ben Delaporte		English	iOS	Free	2.5	pain	Chronic pain symptoms are tough. But tracking them should be easy. Track your pain with symptom, treatment and note tracking, a color coded calendar, graphs, and quick and easy data entry. Recording a new entry doesn't require longer than a few seconds; Chronic Pain Diary takes the pain out of tracking chronic pain. Chronic Pain Diary allows you to name your treatments and symptoms. A few example…					Medical	US, UK, CA	2012-11-22
Chronic Pain Tracker	Chronic Stimulation, LLC	USA	English	iOS	$6,99 Lite: free	4.5	pain	Take the guess work out of pain management with Chronic Pain Tracker. Record your pain history with 19 unique health categories. Review a Summary Report with your doctor in the app, or export a PDF for printing/emailing. For less than a typical insurance co-pay, you can improve the management of your pain. CPT Pro is our complete package offering all of our features and no capacity limits on diar…			X (ad-hoc)		Medical	US, UK, CA	2009-09-17
Chronicle: Chronic Symptom and Pain Tracker	UpandAtom Applications	USA	English	android	N/A		pain
Cluster Headaches				android	Free		Headeache		Export data from app	No
Comprehensive Medicine	Loyal Programs		English	android			pain
CountH	Sadao Kobayashi		English	iOS			pain
Dario del dolor- Catch my pain	Sanovation AG, Zurich University	Switzerland	English, Spanish	iOS			pain
Dealing With Back Pain	Book App		English	android			back pain
Dealing With Back Pain	Koolappz		English	android			back pain
Dental Emergency	Paul Speziale		English	iOS			dental
Diagnosaurus Ddx	Unbound Medicine,Inc Roni Zeiger	USA	English, French, simplified Chinese	iOS, android	2·46$ 1·79€	Not rated	Various types of pain: abdominal, chest, headache, etc.	A quick-reference tool developed to help healthcare professionals perform differential diagnosis with speed and confidence at the point of care.	Diagnosis			Created by: Roni F. Zeiger, MD Published by: McGraw-Hill professional
Diario De Dolor De Cabeza	Benjamin Gerfelder		Spanish	android			pain
Diario migraña	Net Workz LLC		Spanish	iOS			headache
Dienchan Facy Therapy	Viet Y Dao Bui Quoc Chau		English	android			pain
Doado Your Health Companion	Alex Spriet			android		4.5	Postoperative pain		Symptom self monitoring, education (surgery, postop pain)	physiotherapist	No
Doleur	Blevruz		French	android			pain
Dolor crónico	LetltGuide SL.		Spanish	iOS, android			pain
Dolor De Cabeza Wellwave	Alchemy		English	android			headache
Dolor de cabeza-Diario/calendario/registro	TrinnVis as		Spanish	iOS			headache
Dolor De Espalda	Iappodium Labs		Spanish	android			back pain
Dor de Cabeça / Headache App	SODA		English, Portuguese	iOS			headache
El dolor de espalda	Cecile Maurech		Spanish	iOS			back pain
EPM - Essential Pain Management	Qworks Technologies Pvt Ltd		English	iOS	Free	no rating	pain	The EPM Application is a pain management tool developed as a pocket guide for health care workers who have attended the EPM Workshop and use EPM’s principles in their day to day practice. It’s ease of use however, will help any healthcare work to assess and manage pain in a variety of settings. Essential Pain Management (EPM) is a cost-effective, multi-disciplinary program run by the Faculty of P…					Medical	US, UK	2016-04-28
Escala De Dolor	Trate A Dor		English, Spanish	android			pain
Escalas Médicas	Dedihealth		Spanish	android			pain
Essential Pain Management	HealthObs, Ltd	New Zealand	English	iOS, android	Free		pain			X (systematic)
Essential Pain Management	Qworks Technologies Pvt Ltd		English	android	Free. Various in app purchases	5	pain	The EPM Application is a pain management tool developed as a pocket guide for health care workers who have attended the EPM Workshop and use EPM’s principles in their day to day practice. It’s ease of use, will help any healthcare work to assess and manage pain in a variety of settings. Essential Pain Management (EPM) is a cost-effective, multi-disciplinary program run by the Faculty of Pain Medi…					Medical	US	2017-02-22
Estiramientos	Ana Gallardo		Spanish	iOS			pain
Estiramientos	Be On Marketing Online		Spanish	android			pain
FibroMapp Pain Manager +	Bodymap Apps	Scotland, UK	English	android	iOS US$2.99, Android Free. Various in app purchases	4	Fibromyalgia	FibroMapp Pain Manager + goes way beyond just tracking pain...It is the most comprehensive pain tracking app available. (But don't just take our word for it! It's also a 3x HealthLine Best App Award winner!). WE GET PAIN... As chronic pain people ourselves, we know how pain can affect every area of your life - such as sleep and mood, fatigue, aggravating factors, and so much more - not to mention…	Information, Reminders, Self-monitoring, Support to deal with symptoms/disabilities, Trackers		X (ad-hoc)	Created by: Fibromyalgia Association (FMA) UK	Medical	US	2013-11-05
Fibromyalgia	Guides		English	android			Fibromyalgia
Fibromyalgia Magazine	Magazinecloner.Com		English	android			Fibromyalgia
Fisioterapia y Dolor	J Caberizo Hospital Universitario Henares		Spanish	android			pain
Fitness at Work	Tusitala Pte Ltd		Chinese, English	iOS			pain
Fix Pain Hypnosis	Grand Apps Studio		English	android			pain
FMAUKFibroMapp	BodyMap Apps, UK http://www.bodymapapps.com	United Kingdom	English	android, ios	#2,99		For people with fibromyalgia. Tracks pain, fatigue, sleep, mood, medications, and flare ups.	Tracks, pain, fatigue, sleep, mood, medications, and flare ups. Tracks pain (including severity, location, type, and activities that have helped with, or contributed to, pain). Flare ups can be recorded quickly by pressing a button. Tracks sleep (requires screen to be tapped to begin recording sleep or awakening). Tracks medications (including dosage). An alarm can be set to prevent over- or unde…	Reminders, Support to deal with symptoms/disabilities, Self-monitoring, Trackers, Information	Fibromyalgia Association (FMA) UK
Fuse—Post Op. Journal	Imbas Solutions			android		-	Postoperative pain		Symptom self monitoring, education (surgery, postop pain)	No	No
Get rid of a toothache naturally in less than 12 hours	Reimund Lube		English	iOS			dental
Hand Massage Acupressure	Shapes		English	android			pain
Headache	Guides		English	android			headache
Headache				iOS	4,99 ($ can)		Headeache	migraine and headache journal/log/calendar.		No
Headache & Migraine Diary				iOS	1,99 ($ can)		Headeache		Export data from app	No
Headache & Migraine Tracker Pro				iOS	0,99 ($ can)		Headeache			No
Headache 101	Ls Apps Dev		English	android			headache
Headache App	Postano		English	iOS, android	Free		Headache		Export data from app	No
Headache Diagnosis	MatheMEDics, Inc	USA	English	android	1·32$ 0·69€	5	Headache	By asking a series of questions about the headache, the expert system will analyze the answers and provide a list of the most likely diagnoses in order of probability.	Diagnosis
Headache Diary	Marcel Schroder		English	android	1,34 ($ can)		Headache		Export data from app	No
Headache Diary	Froggyware		English	android	2,99 ($ can)		Headache		Export data from app	No
Headache Diary	Benjamin Gerfelder			android	Free		Headache		Export data from app	No
Headache Diary	Jae-Ung Yi, John Seok M.D.		English, French, German, Japanese, Spanish, Swiss	iOS			headache
Headache Diary (ecoHeadache)	ecoTouchMedia (Jae-Ung Yi)	Germany	English / French / German / Italian / Japanese / Korean / Spanish	ios, web	£1.91		headache	Diary for people who have headaches, migraine, or ENT (ear, nose or throat) pain. Tracks pain levels, symptoms, potential triggers, level of disability, and medication taken. Allows start time, end time, and duration of pain to be recorded. Pain can be documented according to location, type, and on a scale of intensity. Varying severity of pain during the course of a headache can also be noted. ‘…	Reminders, Support to deal with symptoms/disabilities, Self-monitoring, Trackers, Information, Export data from app	Same as technical developer (some consultation with patients).
Headache Diary Lite	Froggyware GmbH http://www.froggyware.com ;	Germany	English / French / German / Italian / Spanish	android, web	Lite version free, Android full version: £1.99		Diary for people who wish to record details linked to their headaches or migraines.	Headache diary that allows factors linked to the onset of headaches or migraines to be recorded. Details that can be recorded include date and time, duration, type of headache, location of pain (severity), known triggers, the effects of the headache on the user’s daily routine, the medication taken, and the responses to it. The charts, which summarise a historical list of headaches by severity, c…	Support to deal with symptoms/disabilities, Self-monitoring, Trackers, Information	Same as technical developer
Headache Diary Pro	Appcellent GmbH			iOS	3,99 ($ can)		Headeache		Export data from app	No
Headache helper	Bell Standard, Inc.		English	iOS			headache
Headache Note				iOS, android	Free		Headeache	You can manage headache by recording the pain and the taken medicine	Export data from app	No
Headache Relief Log				android	1 ($ can)		Headeache		Export data from app	No
Headache Tracker	Joseph Southern		English	iOS			headache
Headache Wiper	BeMor Mobile Pty Ltd	Australia	English	iOS	4·99$ 3·63€ Free (Lite)	Not rated	Headache	The PRO App contains 8 easy to follow short videos showing specific exercises and stretches aimed at relieving headache and preventing future ones.	Support to deal with symptoms/disabilities			Created by: Des Morrow, Physical Therapist. Director of the Australian Spine Institute.
HeadacheDiary	Tmoney			android	0,99 ($ can)		Headache			No
HeadacheDiary - Lite	Tim Preuss		English	iOS	Free	No rating	headache	Whether man, woman or child - everyone has headaches sometimes. The main reason is usually stress which is the cause or feeling tense and not moving enough. Even genetic factors like food intolerances may be the cause of headaches. No matter the cause, an accurate logging of headaches may help to identify possible triggers. With the Headache Diary Pro for your iPhone or iPod Touch you get the mos…					Health & Fitness	UK, CA	2012-07-18
Headaches	S Liu		English	iOS			headache
Healing Power	Phil Shapiro			android		-	Postoperative pain		pain self-mgt tools	physician	No
Health And Beauty Part 1- Free	Appbuzz		English	android			pain
Herniated Back Pain Relief Now	Primoapps		English	android			back pain
How To Cure Lower Back Pain	Appsforbusinessgeek		English	android			lower Back Pain
How To Cure Tmj	Bigo		English	android			pain
i Ankylosing Spondylitis	Anatomate-Apps	Australia	English	iOS	Free	4.5	Ankylosing spondylitis	Educational app. Contains voice and text videos that introduce the condition’s symptoms, and refer to associated diseases, diagnostic criteria, genetics, incidence, morbidity/mortality, pharmacological management, and physical therapy. Includes medical imaging, showing sacro-iliitis and syndesmophytes, treatment suggestions and exercise animations.	Information, Self-monitoring Support to deal with symptoms/disabilities			Recommended by: Arthritis New Zealand
iBeatPain for Teens	Take The Wind, Lda.		English	iOS	Free	3	pain	Added new goals Added track progress Fixed an issue that was causing the application to crash on start. Fixed an issue that was preventing the Inspiration Box to show correctly. Minor bug fixes The iBeatPain application helps teens with chronic pain and other symptoms. Are you a teen who has suffered with pain for months or even years? Have you limited your daily activities because of your sympto…					Health & Fitness	US	2015-06-01
iheadache	BetterQOL.com, USA http://www.betterqol.com	USA	English	ios, web	Lite' version free on Apple; Apple full version: £3.20		Headache diary that allows the number of headaches, their duration and severity, the degree of disability and impact, medication and usage, symptoms, and triggers to all be tracked.	Headache diary that allows the number of headaches, their duration and severity, the degree of disability and impact, medication and usage, symptoms, and triggers to all be tracked. Classifies headaches according to criteria expressed by a UK-based medical professionals' organisation, the International Headache Society, as a migraine, probable migraine, tension headache or unclassified headache. …	Support to deal with symptoms/disabilities, Self-monitoring, Trackers	Same as technical developer
iHeadache Headache & Migraine Diary	BetterQOL, Inc.	USA	English	iOS	4·84$ 3·76€ 'Lite' free	3.25	Headaches	Headache diary that tracks the number of headaches, their duration and severity, the degree of disability and impact, medication and usage, symptoms, and triggers. It can generate reports to be shared with a doctor.	Self-monitoring, Support to deal with symptoms/disabilities, Trackers, Export data from app	Yes		Created by: Brian D. Loftus, MD Recommended by: National Headache Foundation (NHF), USA
iMigraine - migraine tracker	Softarch Technologies AS		English	iOS	Free	2.5	headache	iMigraine is a simple migraine journal and headache tracking app designed to help you keep track of your migraines, migraine medication, pain medications, headaches, headache tracking, migraine triggers, migraine symptoms tracker. It is designed using inputs and feedbacks from medicine practitioners, general physicians who require a simple and effective tool for their patients. iMigraine has more…					Medical	US, UK, CA	2016-02-12
iPain	Anouk Stein, M.D.		English	iOS	Free	no rating	pain	This app is freely presented by the generous efforts of Freedom Pain Hospital in Arizona. It is a customizable daily journal for chronic pain clients to keep track of their day to day symptoms, and the strategies they use for treating, managing, and coping with chronic pain. Designed in collaboration with Petra E. Peper, Ph.D. Licensed Psychologist.					Medical	CA	2011-10-14
IREHAB Back pain	iREHAB.com LLC		Japanese, Spanish	iOS			back pain
Irritable Bowel Syndrome	Vertex Mind Llc		English	android			IBS
iSleepAid	Vanilla Breeze Co.,Ltd		English	iOS			pain
Itriage Elath	Itriage, Llc		English	android			pain
Jaquecapp	Terranology		Spanish	android			pain
Joint Pain Relief Now	Dietsandfads		English	android			joint pain
Keele Pain Recorder	Keele University	UK	English	iOS, android	Free		pain			X (systematic)
Kendall Pain Relief Center	Cloud Nine Development		English	android			pain
Knee Pain	Ortho Tech Inc	Canada	English	iOS, android	8·23$ 5·99€	Not rated	Knee Pain	In easily understandable language this course explains the common causes, diagnosis and management of knee pain.Intended for healthcare providers and patients.	Information			Created by: Dr. Eric Gozna, MD, Orthopedic Surgeon, Professional Biomedical Engineer
Knee Pain Relief	Easysource		English	android			knee Pain
Kyusho Healing	Interactive Motion		English	iOS			pain
Lebanon Pain Relief Center	Cloud Nine Development		English	android			pain
Left Side Lower Back Pain	Softomatrix		English	android			lower Back Pain
Live Pain Free The Natural Way	Apps Ahoy		English	android			pain
Living With Crohn´S Disease	Vertex Mind Llc		English	android			Chron
Living With Fibromyalgia Pv	Vertex Mind Llc		English	android			Fibromyalgia
Manage IBS now	Tommy Connolly David Ridgeway		English	iOS			IBS
Manage My Pain Lite/Pro	ManagingLife http://www.managinglife.com ;	Canada	English	iOS, android, web	Free. Various in app purchases	4.5	Allows pain to be recorded, tracked and analysed.	Allows a user to track and record pain on a customizable entry screen. Displays the information in statistics and graphs. Track, analyze, and share your pain. Pain tracker that allows the user to record instances of experiencing pain. For people with arthritis/rheumatism, cancer, headaches/migraines, fibromyalgia, or other causes of chronic pain. Pain characteristics that can be entered include l…	Self-monitoring, Support to deal with symptoms/disabilities, Trackers	X (ad-hoc) Dr. Anuj Bhatia - Director Anesthesia Chronic Pain Clinical Services, University Health Network Dr. Alim Punja - Pain Management MD, Rouge Valley, Allevio, Canada		Recommended by: Slovak League Against Rheumatism	Medical	US, UK, CA	2019-01-11
Medical Spanish By Mavro	Mavro Inc		English	android			pain
Meditation Anywhere Pain	Meditationanywhere		English	android			pain
Migraine				iOS	Free		Headache		Export data from app	Yes
Migraine Buddy	Healint		English	iOS	Free	5	headache	Best Migraine app in 2019 and for the second time according to Heathline More than 1.8 million downloads and rated as the #1 Migraine App according to both patients and doctors, with advanced reporting & exports, automatic tracking of weather pressure and sleep! Migraine Buddy is an advanced migraine headache diary and tracking app designed with neurologists and data scientists. More than a migra…					Medical	US, UK, CA	2015-03-27
Migraine Buddy - The Migraine and Headache tracker	Healint		English	android	Free. Various in app purchases	4.7	headache	Migraine Buddy is an advanced migraine headache diary and tracking app designed with neurologists and data scientists. More than a migraine journal, Migraine Buddy will help you quickly record and identify all aspects of an attack, including migraine triggers, symptoms, medications, frequency, duration, pain intensity, location, and other lifestyle factors so users can improve their migraine cond…					Medical	US	2019-10-02
Migraine Calendar				android	1,96 ($ can)		Headache		Export data from app	No
Migraine Diary				iOS	1,99 ($ can)		Headache		Export data from app	No
Migraine Diary				iOS	Free		Headache		Export data from app	No
Migraine Diary				android	Free		Headache			No
Migraine Free				iOS	Free		Headache		Export data from app	Yes
Migraine Institute				iOS	0,99 ($ can)		Headache		Export data from app	Yes
Migraine Institute				android	Free		Headache			No
Migraine Journal				iOS	Free		Headache		Export data from app	No
Migraine Meter				iOS	Free		Headache		Export data from app	Yes
Migraine stop	TENRAYsOFT, LLC		English	iOS	Free		Headache		Export data from app	No
Migraine Tracker!	Sage Young		English	iOS	Free		Headache			No
MigraineMate				iOS	Free		Headache			No
Migralex				iOS	Free		Headache		Export data from app	Yes
Miniatlas del dolor	Licitelco S.L		English, Spanish	iOS			pain
Miniatlas del dolor neuropático	Licitelco S.L.		English, Spanish	iOS			pain
Miniatlas Dolor	Clyna S.A		Spanish	android			pain
Miniatlas Dolor Crónico	Clyna S.A		Spanish	android			pain
Miniatlas Dolor Neuropático	Clyna S.A		Spanish	android			pain
Miniatlas sistema nervioso central	Licitelco S.L.		Spanish	iOS			pain
Muscle Trigger Point Anatomy	Real Bodywork		English	android			pain
My best medicine	Jae-Ung Yi		English, French, German, Japanese, Korean, Spanish	iOS			pain
My Headache Diary				iOS	Free		Headache			No
My Hip Rehab	App Squid			android		2	Postoperative pain		education (surgery)	No	No
My Pain Diary	DamoLab LLC		English	android	Free. Various in app purchases	4	pain	The popular pain tracking app for iOS is now on Android! Join over 50,000 chronic pain patients who have managed their pain and symptoms with My Pain Diary. WITH MY PAIN DIARY YOU CAN: - Keep an accurate record of your condition for your doctor. - Compare multiple conditions and metrics on a single, interactive graph which makes finding correlations easy. - Learn how much you are affected by humi…					Medical	US	2016-05-15
My Pain Diary & Symptom Tracker: Gold Edition	Damon Lynn	USA	English	iOS	$ 4,98	4.5	Allergies, back pain, chronic fatigue syndrome (CFS), depression, fibromyalgia, headaches, or migraine	Intensity of pain, its locations, types, triggers, and treatments can be documented. Up to three text notes can be saved. Interactive graphs help in finding correlations between factors and the weather. Reminders to keep entries consistent can be issued. Password protected. Data can be backed up via ‘Dropbox’. This is the successor the the popular, award-winning, best selling, doctor recommended …	Reminders, Self-monitoring		X (ad-hoc)	Created by: RSD/CRPS patient, Recommended by: World Pain Foundation (WPF), Awards: Best App Ever Awards 2013 Winter/Spring 2012 Web Health Award	Medical	US,UK, CA	2016-08-12
My Pain Diary: Chronic Pain & Symptom Tracker	Damon Lynn	USA	English	iOS, android	US$4.99	4.5	pain	Heads up! There's a new and improved version of this app named "My Pain Diary: GOLD EDITION". Find it below in the 'Developer Apps' section or search for it by name. Track your chronic pain, symptoms, triggers and more to create detailed reports you doctor will love! - "My surgeon spotted something by looking at my graph and was able to diagnose another condition, which is now being treated." Joi…			X (ad-hoc)		Medical	US,UK, CA	2009-11-12
My Pain Diary: Chronic Pain Management	Damon Lynn, USA http://www.damonlynn.com	USA	English	ios	£3.99		Pain diary for people with allergies, back pain, chronic fatigue syndrome (CFS), depression, fibromyalgia, headaches, or migraine.	Pain diary for people with allergies, back pain, chronic fatigue syndrome (CFS), depression, fibromyalgia, headaches, or migraine. Allows multiple chronic conditions to be tracked. Intensity of pain, its locations, the types, the triggers, and treatments can be documented. A text note, and up to three photos, can be added to each entry (perhaps showing discoloration, swelling, rashes, etc). Inter…	Self-monitoring	Created and actively maintained by a RSD/CRPS patient
My Pain Log	Samantha Roobol		English	iOS	Free	4	pain	This app makes it easy to track your pain & symptoms and report to your doctors. Use our pain diary to keep track of your pain over time and share it with your doctor at your next appointment. Track a variety of pain elements, including location, pain duration, triggers and more. A pain diary is used to monitor levels of pain over a long period of time and collect data on possible triggers for th…					Medical	US, UK, CA	2018-08-06
My Pain Logs	Subinprara infotech, Inc	USA	English	iOS	Free	3.5	pain	My Pain Logs allows you to quickly and easily keep a detailed record of your pain, symptoms, triggers, medication, activities and pain location drawings. You can find physicians near you and share your pain logs with using mobile devices and computers, treatment specific to your condition. You can communicate with physicians prior to sharing your information and discuss your condition via in-app …					Medical	US, UK, CA	2015-09-15
My Pain Tracker - Pain Diary	Merc App Solutions, LLC	USA	English	iOS	Free		pain
MyGraine				iOS	Free		Headache		Export data from app	No
myIBD	Toronto’s Hospital for Sick Children, Canada	Canada	English	iOS, android, web	Free	4.5	Inflammatory bowel disease (IBD). Aims to provide the user with new perspectives on the task of managing inflammatory bowel disease (IBD).	Aims to provide the user with new perspectives on the task of managing inflammatory bowel disease (IBD). Allows the recording of important personal healthcare information, including appetite, mood, pain, and visits to the lavatory. Entries can be viewed as a graph, or as text. The app also contains information about IBD	Information, Self-monitoring, Support to deal with symptoms/disabilities, Trackers	Same as technical developer		Created by: Karen Frost, , Dr. Johan Van Limbergen, Meaghan Wright, Ritchie Hwang, Recommended by: Crohn’s and Colitis Australia,Collaborative Chronic Care Network, USA
MyoCycle	MyoMedic PTY Ltd		English	iOS			pain
Natural Arthritis Relief	Appzdepo		English	android			arthritis
Natural Pain Management	Vertex Mind Llc		English	android			pain
Natural Pain Management	Biz App Media		English	android			pain
Natural Pain Management	Paddleo		English	android			pain
Natural Pain Management	Koolappz		English	android			pain
Natural Pain Remedies	Selvi M		English	android			pain
Nature Sound	Zodinplex		English	android			pain
Nccp Breast Pain Diary	Cpd Sessions		English	android			brest pain
Neck Pain Prevention	Templebellchime		English	android			neck pain
Neck Pain Relief	Easysource		English	android			neck pain
No Back Pain Problems	Umeetone		English	android			back pain
Nurse´s Drug Guide 2011 Tr	Mobile Systems, Inc		English	android			pain
Odontalgia Pro	DtD BV		Spanish	iOS			dental
Oh, My head				iOS	1,99 ($ can)		Headeache
OIDometer	Entorno Digital de Comunicación SL		Spanish	iOS, android			pain
Online Anesthesia	Arjus Limited		English, Spanish	android			pain
Opioides	Grünenthal de Mexico SA de CV		Spanish	iOS			pain
Opioids Dosage Conversion	Santa Clara Valley Medical Center & Chris Marcellino	USA	English	iOS	Free	4.5	Pain	Opioid analgesic dosage conversion calculator for use by trained medical professionals.	Support to opiod dosage			Created by: Norris Vivatrat, MD
Orthopedic Pain Management	It Mentor Apps		English	android			orthopedic pain
Ouch - Chronic Pain Log, Migraine Diary	GammaPoint, LLC	USA	English	iOS	US$1.99		Headache
Ouchie: your pain management companion	Ouchie		English	android	Free. Various in app purchases	4	pain	Ouchie is the app you need for chronic pain management. Use Ouchie to take control of your chronic pain through sound data and social support. It was created for pain patients by pain patients, with input from best-in-class doctors and pain specialists. Ouchie will always be a free download for users, and our mission is simple: We want to help you find a way to feel better, faster. The app has a …					Medical	US	2019-09-23
OurHurt - Chronic Pain	Labs Health Company	USA	English	android	Free		pain			X (systematic)
Pain	Doctot	Ireland	English	iOS	7·55 5·49€	Not rated	Pain	The app includes the most widely used clinician-administered assessment scales and lookup tables related to Pain patients. It contains an opioid equivalence comparison lookup.	Patient monitoring, Support to opiod dosage			Created by: Declan Lyons Professor of Medical Science & Consultant Physician at University Hospital Limerick
Pain	Jere Parker		English	android			pain
Pain & Depression/Ambiscience	Tesla Software, Llc		English	android			pain
Pain Acupressure	Jeejee		English	android			pain
Pain App	University of Greenwich		English	iOS	Free	No rating	pain	App for assessment of pain in older people and patients with cognitive impairments.					Medical	US, UK	2013-07-12
Pain Assessment	Kuntec		English	android	free	Not rated	Pain	Assessment of pain in older people.	Patient monitoring			Created by: University of Greenwich, British Geriatrics Society, The British Pain Society
Pain Assessment Tool for children	Bcom	South Africa	English	android	Free. Various in app purchases		pain	This app monitors and records the pain experienced by a child. It is recommended that a parent or carer helps a child in recording their information. The app is a tool to assist in monitoring and recording a child’s pain levels but is not meant to replace a full and thorough assessment when this is needed. All screens can be bypassed if not relevant to the child being assessed. Please Note: The a…					Medical	US	2017-09-14
Pain Audiobook	Twayesh Projects		English	android			pain
Pain Buddy	MSERV	UK	English	android	Free		pain			X (systematic)
Pain Care	Ringful Health, LLC ( Robert Wood Johnson Foundation) http://www.ringfulhealth.com	USA	English	iOS, android	Free	4.5	Tool to help patients manage chronic pain or sports injuries.	Allows the user to track medications, side effects, symptoms of pain, and triggers. After the journal has been kept for some time, the app will estimate the cause of the pain, and consider the efficacy of treatment/medication options. Patient history, with analytic charts designed to fit into the decision-making workflow of pain specialists. Data can be shared with a doctor securely via the Inter…	Information, Reminders, Self-monitoring, Support to deal with symptoms/disabilities, Trackers	X (systematic) Dr Vishal Kancherla [USA-based specialist in pain] and the Louise H. Batz Patient Safety Foundation		Created by: Dr Vishal Kancherla, Recommended by: Family Caregiver Alliance (FCA), USA, Louise H. Batz Patient Safety Foundation, USA
Pain Care App	appliedVR		English	iOS	Free	5	pain	Pain Care App is an on-the-go toolkit for people living with chronic pain. Designed to help users regain control of their lives from pain, it offers calming meditations, evidence-based training strategies, breathing tools, and tracking functionality – all at your fingertips. Use it to Relax and Reflect. Relax: Expand your skillset for living well with pain through daily practice of relaxation exe…					Health & Fitness	US	2018-01-16
Pain Clinic	Aventura	USA		android	Free		pain
Pain Companion	Sanovation AG	Switzerland	English	iOS, android	Free. Various in app purchases	3.5	pain	Pain Companion allows you to: - create detailed color pain drawings to express the location and the intensity of your pain - track other symptoms like stress, fatigue and your mood - view a generated chart showing the course of your symptoms and wellbeing - meet patients who have the same pain pattern and medical conditions like you - discuss best practices regarding treatment and pain management…			X (ad-hoc)		Medical	US	2016-09-29
Pain Control- R Collin	I-Mobilize Inc Rick Collingwood		English	android			pain
Pain diary	Jae-Ung Yi John Seok M.D.		English, French, German, Japanese, Spanish, Swiss	iOS			pain
Pain Diary - Pain Management Log	Stay fit with Samantha		English	android	Free. Various in app purchases	3.5	pain	This log can help you track the everyday things that have an impact on your pain. When you understand what makes your pain worse, you can begin to work on ways to reduce or deal with your pain “triggers.” The more you know about how your body reacts, the more you can be in control. And being in better control can help you be less afraid and better able to manage your pain. This app makes it easy …					Medical	US	2018-11-24
Pain Diary (Privacy Friendly)	SECUSO Research Group		English	android	Free. Various in app purchases	3	pain	Privacy Friendly Pain Diary can help you track pain. It allows you to make daily diary entries recording your condition and the intensity, location, nature and time of the pain you feel, as well as the medication you take and additional notes. Records of your pain can help health professionals gain an insight into the pain you are experiencing. The main view of the app is a calendar. A new diary …					Medical	US	2018-03-29
Pain Diary & Forum CatchMyPain	Sanovation AG	Switzerland	English	iOS, android	Free. Various in app purchases	3.5	pain	Keep a medical health record, track your pain, diagnosis, symptoms and medication and share it with your doctor. KEEP A PAIN DIARY Medical experts recommend you keep a pain diary to be able to treat pain effectively. The award winning "Catch My Pain" app allows you to visualize and monitor your pain by creating detailed drawings and by tracking other relevant information. The diary will help you …		X (systematic)			Medical	US	2016-03-07
Pain Easer	Jeejee		English	android			pain
Pain Log	Raúl R.	Spain	English	android	Free. Various in app purchases	4	pain	Are you fed up with your headaches? Would you like to know the reason of your pain in the ribs? Don't you know why do you have pain somewhere in your body? Download right now Pain log and write down whenever you have a pain, you can easily have a diary with all the information in order to look for a solution. Export, send or share easily the results through vía google Drive, Dropbox, Telegram, Wh…					Medical	US	2015-03-28
Pain Log	Kshitij Grover		English	android			pain
Pain Log - Pain Tracker	Skillo Apps		English	android	Free. Various in app purchases	3.5	pain	Pain Log can help you track pain. It allows you to make daily diary entries recording your condition and the intensity, location, nature and time of the pain you feel, as well as the medication you take and additional notes. Records of your pain can help health professionals gain an insight into the pain you are experiencing. The main view of the app is a calendar. A new diary entry can be added …					Medical	US	2019-07-18
Pain Logger	Talon Strike Software	USA		iOS	US$1.99		pain
Pain Management	Prime Technology Group, Inc	USA		iOS	Free		pain
Pain Management Plan	Advanced Digital Institute - Health		English	iOS	free	No rating	pain	The PainSense Pain Management Plan app has an underlying CBT based approach which is renowned for its effectiveness in developing self management skills and self efficacy amongst people with persistent pain. The Pain Management Plan app is structured to lead the user through the methods used, learn more about their condition and to use target setting to improve their quality of life. In this init…					Medical	UK	2015-02-17
Pain Management Pocket	Borm Bruckmeier Publishing Llc		English	android			pain
Pain Management pocketcards	Börm Bruckmeier Publishing LLC		English	iOS	$4,99	4	pain	The Pain Management pocketcards provide you with: - Guidelines on the assessment and management of pain - Breakthrough pain management and rescue dosing - Opioid equianalgesic dosing table - Management of opioid-related adverse events Features ► Easy navigation to critical information. ► Multiple navigation possibilities via TOC view and Classic View ► Well illustrated charts,tables and diagrams.…					Medical	US, UK, CA	2010-03-27
Pain Monitor 2.0	Azucena Garcia-Palacios	Spain		android	Free		pain			X (systematic)
Pain Pal: chronic pain control	ZenZone Interactive Limited		English	iOS	$ 1,99	No rating	pain	Pain Pal is an exciting collaboration between Dr Thomas S. Nasser and ZenZone Interactive. The collaboration aims to offer an effective alternative to opioids alone in the management of chronic pain symptoms. This life enhancing technology was originally built thanks to awards granted to ZenZone Interactive by the UK Government (via the London Development Agency) and the European Commission (via …					Medical	US	2016-05-04
Pain Release Hypnosis Pr	Awake Media Publications		English	android			pain
Pain Relief	Guides		English	android			pain
Pain Relief	Obstetric Anesthetists Association	UK	English and 35 languages	android	Free	4.6	Labour and Delivery	This app is aimed at mothers and their partners, as well as health care professionals. Pain Relief in Labour; Anesthesia for Caesarean delivery; Epidural information; Useful phrases (phonetic) and High Body Mass Index	Support to deal with symptoms/disabilities, Information			Created by: Obstetric Anaesthetists' Association
Pain Relief 2.0	Zeleniak		English	android			pain
Pain Relieve English	Hans-Peter Zimmermann		English	iOS			pain
Pain Scale	Guo Jhong-Yi		English	android			pain
Pain Scale - your digital log for chronic pain	odeesoft	Germany	English	iOS	US$5.99	3	pain	iPainscale is your digital pain scale app. Individual pain estimations will be saved automatically along with date, time and an optional note. Create a PDF report with your entries and save them or email them to your healthcare professional. A graph shows you a quick overview of your entries for the last days, weeks, or months.					Medical	US	2010-12-17
Pain Scale VAS			English	android	Free. Various in app purchases		pain						Medical	US
Pain Scored	Patient Premier		English	iOS, android	Free. Various in app purchases	4	pain	Pain Scored is an easy daily log for anyone to report and track symptoms, improvements, and problems. Using a simple interface, this dynamic tool uses a variety of tools to help you measure pain, symptoms and side effects. Most important, reports are simple and easy to understand. Behind them, however, is a powerful tool which puts the data together. The goal is not zero pain- its improved qualit…					Medical	US	2018-06-15
Pain Squad	The Hospital for Sick Children		English	iOS	Free	no rating	pain	Enlist in the Pain Squad™ today and search for clues to put pain where it belongs … behind bars. The Pain Squad™ electronic pain diary is a tool created for kids with cancer to fight back against their pain. Developed by researchers at The Hospital for Sick Children (SickKids), this is an evidence-based pain diary that plays like a game and is recommended for children 8 to 18 years of age with ca…					Medical	US, UK, CA	2014-10-28
Pain therapy- Terapia de dolor	Winzig		Spanish, English subtitles	iOS			pain
Pain Toolkit	Advanced Digital Institute - Health	UK	English	iOS, android	Free	No rating	pain	The PainSense Pain Toolkit App provides a set of practical, easy to use self-management tools for people with persistent pain. The Pain Toolkit App is based on proven methods developed with the help of people living with persistent pain. There are a set of information resources that a user can browse. Extended functionality in the App includes 12 self-help tools, a diary function, and a set of se…			X (ad-hoc)		Medical	US, UK, CA	2015-02-13
Pain Tracker	iHealth Ventures, LLC	USA	English	iOS	US$0.99		pain
Pain Tracker	Terry Billingsley		English	iOS	Free	No rating	pain	Pain Tracker provides the means to track pain events for any part of your body. Quickly see a body avatar which shows which part of your body has the most pain, great for when speaking with your physician. No more guessing how often you experience a pain event for a specific part of your body, now you will know for certain. You can add the type of medications you are on and the dosage. While addi…					Health & Fitness	US	2014-11-20
Pain Tracker - Daily Symptom Diary	Pixel Mafia, LLC	USA	English	iOS	US$1.99		pain
Pain Tracker & Diary	Nanolume, LLC	USA	English	iOS, android	iOS: US$2.99, android: Free. Various in app purchases	4	pain	WHY DID WE MAKE THIS? This app was designed by an MD pain specialist and PhD pharmacologist to help users with chronic pain create a comprehensive picture-diary of the different types of pain felt throughout the day. By keeping such a detailed diary, users can now see and better understand what they have been feeling and if the treatments being tried are helping them. TRACK IT BETTER. TREAT IT BE…					Medical	US	2019-08-26
Pain Tracker HD	AppYourWay	Canada	English	android	Free. Various in app purchases	1.5	pain	Pain Tracker provides the means to track pain events for any part of your body. Quickly see the default pain areas using a body avatar which shows which part of your body has the most pain and the last time a specific pain area was experienced, great for when speaking with your physician. No more guessing how often you experience a pain event for a specific part of your body, now you will know fo…					Medical	US	2017-01-27
Pain Treatment	Wait		English	android			pain
Pain-Scale	BGU Medical Informatics Research Center		English	iOS	Free	no rating	pain	This application used for research to monitor the pain levels of subjects in a monthly based: after entering unique code , once in a month subjects are reporting their subjective pain levels in the head and the shoulders using the application to the main server.					Health & Fitness	US	2016-05-08
PainCal				iOS	1,99 ($ can)		Headache		Export data from app	No
PainCalendar				iOS	5,99 ($ can)		Headache			No
Painometer V2	ALGOS-Research on Pain	Spain	Catalan, English, French, Portuguese, Spanish	android	Free	4.8	Pain intensity	Contains four well-known and validated pain intensity scales. Users can save pain intensity data, as well as information about the scale used, the day and the time of assessment. Besides, one can see the evolution of the pain intensity in a graph, and send the data to an email address.	Patient monitoring, Self-monitoring			Created by: ALGOS. Research on Pain (Universitat Rovira i Virgili), Awards: Mobile World Capital mHealth Award
PainPoint – Prevent Work Injury	www.ohcow.on.ca		English	iOS	Free	No rating	pain	Download this useful app that delivers a very basic ergonomic assessment by running through a series of diagrams and questions to pinpoint musculoskeletal pain, identify possible sources, and discover practical solutions - right from your smartphone! The results are depicted on a body map, with recommendations to address work-related musculoskeletal disorder (MSD) hazards that could be contributi…					Health & Fitness	US	2015-10-04
PainScale - Free Chronic Pain Tracker Diary	Boston Scientific Inc	US	English	android	Free. Various in app purchases	3.5	pain	The PainScale app offers a FREE suite of pain management tools to help chronic pain patients to scale their pain. Manage a Pain Tracker Diary! Created with input from doctors and chronic pain patients, the Pain Diary acts as a pain tracker and organizes all the information the patient needs in one accessible location. With over 800 organized articles, health tips, exercises, information on pain m…					Medical	US	2019-09-27
PainScale - Pain Diary and Coach	Boston Scientific	USA	English	iOS, android	Free		pain			X (ad-hoc)	X (ad-hoc)
PainScale - Pain Tracker Diary	Boston Scientific	US	English	iOS	Free	4.5	pain	The popular pain tracking app for mobile! Join over 100,000 chronic pain patients who manage and scale their pain and symptoms with PainScale; the highly-ranked pain tracker health app on the web! The PainScale app offers a FREE suite of pain management tools to help chronic pain patients to scale their pain and manage a pain tracker diary! Created with input from doctors and chronic pain patient…					Medical	US	2017-07-11
PainTrackr - Track Pain, Chronic Pain, and Pain History	Involution Studios	USA	English	iOS	Free		pain
PainTrakr	Black Slate Software Inc.		English	iOS	Free	No rating	pain	PainTrakr is a simple way to track and attempt to take control of your pain. Track any type of pain from headache to back pain to arthritis pain. Pain data is displayed in an easy to understand graph that helps you visualize how your pain levels are improving or worsening over time. Enter your pain level from zero to ten, zero being no pain and ten being the worst pain you can imagine. Add option…					Medical	US, UK, CA	2016-03-25
PainTrek				iOS	Free		Headache			Yes
Pauseboogie	Plant ApS,	Denmark	Danish	iOS, android	Free	4.5	Arthritis or osteoarthritis	Demonstrates how to perform a series of exercises intended to ease and prevent pain and discomfort in muscles and joints. Lists exercises for the back, feet, hips, knees, neck, and shoulders	Information, Support to deal with symptoms/disabilities			Created by: Gigtforeningen (patient organisation specialising in arthritis) Denmark
Pediatric Pain Journal V2	Greggh		English	android			pain
Perfect Posture Exercises	Tommy Tessandori		English	android			pain
Phrase Board	Eamonn and Ian LLC,	USA	Arabic, English, French, German, Italian, Spanish, Swedish	iOS	Free (English) The other six languages are available through in-app purchase	2.5	Patients with speech difficulties	Allows people who cannot speak to display some basic concepts to other people. Large ‘Yes’ and ‘No’ buttons offer a means of simple expression. Scrollable lists of ‘Having’, ‘Feeling’, and ‘Want’ statements provide for quick communication. Custom messages and frequently employed phrases can be input and saved. A message bar highlights statements. A ‘Pain’ page allows pain to be expressed. A slide…	Improving communication, Support to deal with symptoms/disabilities			Recommended by: Central Coast Children Foundation, USA, Patient group specializing in communication disability, Australia
Physiotherapy Back Pain	Moreapps		English	android			back Pain
Physiotherapy Help Guide	Creativity Knowledge App			android		3.8	Postoperative pain		education (postop pain)	No	No
Pocket Physio	Care UK HC			android		4	Postoperative pain		goal setting, education (postop pain)	physiotherapist	No
Prevent Back & Spine Pain	iGlimpse Ltd	UK	English	iOS, android	1·99$ 1·45€	5	Back Pain	This app helps patients to learn a variety of exercises that stretch, strengthen, and stabilize important muscles and ligaments supporting the spine and core.	Support to deal with symptoms/disabilities			Created by: Dr Philip Striano, certified chiropractic sports physician
Prevent Lower Back Pain	iGlimpse Ltd	UK	English	iOS, android	1·99$ 1·45€	5	Lower Back Pain	This app helps patients to learn a variety of exercises that stretch, strengthen, and stabilize important muscles and ligaments that support the lower back	Support to deal with symptoms/disabilities			Created by: Dr Philip Striano, certified chiropractic sports physician
Prevent Upper Back & Neck Pain	iGlimpse Ltd	UK	English	iOS, android	1·99$ 1·45€	5	Upper Back and Neck Pain	This app helps patients to learn a variety of exercises that stretch, strengthen, and stabilize important muscles and ligaments that support the neck and back.	Support to deal with symptoms/disabilities			Created by: Dr Philip Striano, certified chiropractic sports physician
Rehuma Track	Mutterelbe Medical Ug	Germany	English, French, German	iOS, android	Free	4.5	Arthritis and ankylosing spondylitis	Helps people with rheumatism monitor their condition. Personal facts (for example, inability to work, morning stiffness, times of infection, etc) can be recorded and tracked. Functional-ability assessment questionnaire of symptoms. Pain levels can be logged in a ‘Pain diary’ (‘Visual Analogue Scale’, VAS). Represents rheumatism by means of a tracing development, lists, or calendars. Notes can be …	Information, Reminders, Self-monitoring, Support to deal with symptoms/disabilities, Trackers			Created by: Dr. Peer Malte Aries, Rheumatologie, Klinische Immunologie, Hamburg, Germany/EULAR
Release Pain with Andrew Johnson	Michael Schneider		English	iOS			pain
Relieve Sciatic Nerve Pain	Candiapp		English	android			Sciatic pain
RheumaBuddy	Daman P/S		English	iOS	Free	4.5	rheumatoid arthritis	TRACK YOUR DAY USING THE DIGITAL DIARY By rating your daily RA symptoms using a smiley scale, you can easily track and register your daily mood, level of fatique, morning stiffness and pain level day by day. The app then calculates your daily overall status, which helps you track and remember your development over time. WHAT WAS SPECIAL TODAY? You can add personal notes and map your daily joint p…					Medical	UK	2014-10-05
RheumaTrack	Nicole Derouaux of Mutterelbe Medical UG, Germany http://www.mutterelbe.de	Germany	English / French / German / Spanish / Turkish	android, ios	Free		Helps people with rheumatism monitor their condition.	Helps people with rheumatism monitor their condition. Personal facts (for example, inability to work, morning stiffness, times of infection, etc) can be recorded and tracked. Allows the development of the condition to be tested with a functional-ability assessment questionnaire of symptoms (‘Funktionsfragebogen Hannover’, FFbH). Pain levels can be logged in a ‘Pain diary’ (pain scale based on the…	Reminders, Support to deal with symptoms/disabilities, Self-monitoring, Trackers, Information	Same as technical developer
Rückenschmerz Manager Lite	Julia Bechmann		German	android			pain
Sciatica Relief	Bigo		English	android			sciatic pain
Scores Pediatría	Joselu		Spanish	android			pain
Shoulder Injuries	Emanuel Petroulakis		English	iOS			Shoulder Pain
Shoulder Pain	Ortho Tech Inc	Canada	English	iOS, android	8·23$ 5·99€	Not rated	Shoulder Pain	This course explains the 6 most common causes of shoulder pain, how they are diagnosed/treated and shows a simple 3-minute examination to identify each one. Intended for healthcare providers and patients	Information			Created by: Dr. Eric Gozna, MD, Orthopedic Surgeon, Professional Biomedical Engineer
Shoulder Pain Treatment	Trafficapps		English	android			shoulder Pain
Signs & Symptoms Low Back Pain	BuiltByDoctors		English	iOS	Free	No rating	lower Back Pain	The Signs & Symptoms Low Back Pain helps the patients to self-manage Low Back Pain using interactive tools. This app gives the patient important information regarding signs and symptoms of Low Back Pain and management of the disease. This app also allows the patient to record and trackpPain levels along time with an incredible graphing option. The patient can show these records to the doctor and …					Medical	US	2016-06-03
Simplyhealth Back Care App	Fivebyfive		English	android			back Pain
Síntomas De Salud	Farmaguía		Catalan, English, Spanish	android			pain
Sleep Hypnosis-Back Pain	Sleep Learning		English	android			back Pain
SmallTalk Intensive Care	Lingraphicare America Inc, USA http://www.aphasia.com	USA	English	ios, web	Free	3.5	Patients with speech difficulties. Provides a list of phrases and images with which patients can communicate to medical professionals some of their needs and feelings (such as "I have chest pain", or "I want a doctor").	Provides a list of phrases and images with which patients can communicate to medical professionals some of their needs and feelings (such as "I have chest pain", or "I want a doctor"). Intended for patients and people who have difficulty speaking and for people who cannot speak at all. Phrases chosen are spoken in a natural human voice, and accompanying pictures emphasise meaning.	Improving communication, Support to deal with symptoms/disabilities	Work with healthcare professionals		Recommended by: Central Coast Children Foundation, USA, Aphasia Hope Foundation (AHF), USA
SmallTalk Pain Scale	Lingraphicare America Inc	USA	English	iOS	Free	4.5	Patients with speech difficulties. Allows people who cannot speak (particularly people with aphasia, apraxia, or dysarthria) to communicate amount and type of pain felt to other people (including caregivers, family members, and healthcare professionals).	Allows people who cannot speak (particularly people with aphasia, apraxia, or dysarthria) to communicate amount and type of pain felt to other people (including caregivers, family members, and healthcare professionals). Provides a vocabulary of pictures that talk in a natural human voice. The app’s pain scale is based on images and descriptions of pain from the ‘Wong-Baker Faces Pain Scale’	Improving communication, Support to deal with symptoms/disabilities	Work with healthcare professionals		Recommended by: Central Coast Children Foundation, USA, Patient group specialising in communication disability, Australia
Solutions Of Back Pain	Dsrsol		English	android			back Pain
SOSdolm	ExtremeDevelopment S.L		Spanish	iOS			pain
Surgeon on Call	Phoenix Medical Consulting			android		-	Postoperative pain		Symptom self monitoring, education (surgery, postop pain)	surgeon	No
Symdir - symptom diary made easy	SILECI		English	iOS	Free	no rating	pain	Symdir is a simple and dedicated app to help you track and understand your symptoms. We make it extremely easy to record you daily symptoms and how you feel in just a few clicks. Symdir is developed in collaboration with patients, scientists and doctors. Here is what we offer, all included: * track unlimited symptoms * record factors which you suspect influence your symptoms * view your symptoms …					Medical	CA	2015-10-19
Symple Symptom Tracker	Symple Health, Inc.		English	iOS	Free	4	pain	Symple® is the easiest way to track how you feel, to monitor your health, and to improve your wellbeing. Designed by both clinicians and regular people, Symple® is an enjoyable way to connect to better health. FREE VERSION: • Track up to 5 symptoms in just seconds per day. • Track up to 5 factors that influence how you feel. • Import steps, sleep, dietary calories & heart rate data from Apple's H…					Medical	US, UK, UK	2011-11-17
Symptom Based Radiology	Symptom Based Radiology		English	android			pain
Symptom Diary	Stuart Harris		English	iOS	Free	3	pain	The Symptom Diary helps you talk to your doctor or medical professional about your condition rather than wasting time trying to remember when your symptoms occurred. The Symptom Diary makes it easy and intuitive to record symptoms when they occur. It documents your symptoms in a chart and detailed table that you can email to yourself and/or contacts you select. Each diary entry records a symptom,…					Medical	UK	2013-01-12
Symptom Tracker by TracknShare	Track & Share Apps, LLC	USA	English	iOS	US$4.99	4	pain	Track Visualize Act - revolutionary life tracking. Thousands use TracknShare for symptom tracking, self-help, coaching, teaching, care: regular folks, US olympic athletes, people with chronic pain, rheumatoid arthritis, fibromyalgia, ADHD. Excellent reviews from our users and from >> University of Nebraska-Lincoln Tech EDGE >> Mac Life >> Psychology Today >> The Best Life >> FastCompany ... Check…					Medical	CA	2009-09-08
Symptom Tracker: Pain Headache	Telemedhome,LLC		English	iOS	Free	4.5	headache	Get started with Symptom Tracker for free.Track symptoms, health habits, meds & vitals. With Symptom Tracker, YOU can: • Track over 130 symptoms: pain, headache, migraine, allergies, mood changes, sleep problems & many others • Track: fibromyalgia, IBS, asthma & COPD symptoms • Add your meds and set reminders • Set goals & build healthy habits • Chat and share your health data with your doctors •…					Health & Fitness	US, CA	2018-07-02
Symptom Tracker: Pain History	SmoothMobile, LLC		English	iOS	Free	4	pain	Symptom Tracker offers a simple and easy way to record symptoms daily. It is made for patients with chronic illness to help them monitor their condition and improve their well-being. - Track a symptom by typing or selecting from a pre-filled list of symptoms. - Rate a symptom by dragging the slider below each tracked symptom. - View symptom patterns in a beautifully designed line graph. - Easily …					Health & Fitness	US	2018-09-22
Tame My Pain	Raj Navani	USA	English	iOS, android	US$0.99		pain
The Pain App	Social Care Alba	Scotland	English	iOS	Free		pain
The Simplyhealth Back Care app	FivebyFive	UK	English	iOS, android	Free	3.6	Back Pain	It offers health information and advice to help manage and prevent back pain. There are graphics and videos of exercises and allows patients to keep a pain diary.	Information, Support to deal with symptoms/disabilities			Created by: Simplyhealth (Healthcare provider) In collaboration with: BackCare (Charity) and Nuffield Health (not for profit organization)
Therappee	Huntenhull	UK	English	iOS	Free (it allows in-app purchases)	Not rated	Pain	The app includes some exercise videos designed to help relieve any sort of pain.	Information, Support to deal with symptoms/disabilities			Created by: Tim Allardyce (MCSP, SRP) Professional sports physiotherapist
Therapy Diary	Jae-Ung Yi		English	iOS			pain
Tip Share	ConRadical LLC	USA	English, Spanish	iOS, android	Free	4.5	Arthritis	Helps the user to manage joint pain from arthritis by reading advice and ‘tips’ from other people who are living with the condition. The user can share personal tips about managing arthritis pain, rate other people’s tips, and view tips supplied by the Arthritis Foundation.	Information, Support to deal with symptoms/disabilities			Created by: Arthritis Foundation (patient group specializing in arthritis), Recommended by: Community Health Charities of the National Capital Area USA
TRACK + REACT	Arthritis Foundation		English	iOS	Free	2.5	pain	Discover the impact of your daily activities on your arthritis pain with TRACK + REACT. Track your nutrition, fitness, sleep, medication and mood and compare it to your arthritis pain in the Arthritis Impact graph. TRACK + REACT Features: - Understand which activities are impacting your arthritis pain - Input your information in a secure environment - Identify trends over time in the Arthritis Im…					Health & Fitness	UK, CA	2012-07-21
Track My Pain	King Louie Apps		English	android	Free. Various in app purchases		pain	Track My Pain is an app that allows you to easily track your pain levels throughout the day. Many other apps are cumbersome. This app makes it easy!!					Medical	US	2018-01-08
Track My Pain	Paul Brungardt		English	iOS	Free	No rating	pain	Do you experience pain in your life? Track it quickly and painlessly with Track My Pain Track My Pain is a down to earth app that lets you track your pain quickly and easily. It includes many great features like... -Pain Tracking -Custom Notes -Custom Medications -Local Notifications -Stats -Averages -High and Lows -Pain Log Download today and start tracking your pain quickly and easily.					Health & Fitness	US	2017-11-15
TracknShare LITE	Track & Share Apps, LLC		English	iOS	Free	3	pain	Track Visualize Act - revolutionary life tracking. Thousands use TracknShare for symptom tracking, self-help, coaching, teaching, care: regular folks, US olympic athletes, people with chronic pain, rheumatoid arthritis, fibromyalgia, ADHD. Excellent reviews from our users and from >> University of Nebraska-Lincoln Tech EDGE >> Mac Life >> Psychology Today >> The Best Life >> FastCompany ... Check…					Medical	US, UK, CA	2009-12-02
Traductor de síntomas de salud en 18 idiomas	COFB64 SERVEIS SL		Catalan, English, Spanish	iOS			pain
Tummy tracker	Tolemy communications Pty limited		English	iOS			pain
Ubiqi Health Migraine Tracker				android	Free		Headache			No
Universal-Yoga for Migraines	Saagara LLC		English	iOS, android			Headache
Upper& Lower Back Pain	Nicholas Gabriel		English	android			Lower Back Pain
VAS translator	Geerten van Hooff		Arabic, English, French, Spanish, Portuguese, German, Polish, Serbian, Bulgarian, Romanian, Norwegian, Swedish, Danish, Filipino, Moroccan, Turkish, Chinese	iOS			pain
Village Dental Care	Mike Litman		English	iOS			dental
Virtual Doctor	DSHI Systems, Inc		English	iOS			pain
Visual Scale (painometer, pain level measuring)	Bit Genoma Digital Solutions SL		English	iOS	Free	No rating	pain	Visual Scale is the digitalization of the Visual Analog Scale system, totally configurable and very accurate method to measure pain level. The app has been developed by a very experienced team in app development and with deep knowledge in health area. The main features are: • Configure the measurement scale in different colors: green to red, blue to red • Configure the scale in different faces: m…					Medical	US, UK, CA	2014-11-20
WebMD	WebMD LLC, USA http://www.webmd.com/mobile	USA	English	iOS, android	Free	4.5	Various health conditions Contains informational tools that can guide a user in making decisions about personal health.	Contains informational tools that can guide a user in making decisions about personal health. A symptom checker aids in identifying potential conditions or health issues. Medically-reviewed information about conditions is available. Contains a database on drugs, supplements, and vitamins, with details about usage, side effects, warnings, etc.	Information, Support to deal with symptoms/disabilities	Same as developer		Created by: WebMD LLC, USA (Certified website), Recommended by: National Alliance on Mental Illness (NAMI) Lane County, USA
WebMD Pain Coach	WebMD LLC	USA	English	iOS, android	Free	4.5	Chronic pain conditions: Back pain, Neck pain, Nerve pain, Fibromyalgia, Migraine, Osteoarthritis, Rheumatoid arthritis	The app offers a holistic approach to balancing lifestyle with chronic pain conditions to help inspire a better day.	Information, Reminders, Self-monitoring, Support to deal with symptoms/disabilities, Trackers			Created by: WebMD LLC, USA (Certified website)
WebMD: Check Symptoms, Find Doctors, & Rx Savings	WebMD LLC	USA	English	android	Free. Various in app purchases	4.5	pain	From WebMD, the one healthcare app you need to check symptoms; learn about conditions and drugs; research treatments and diagnoses; find doctors and specialists in your area; get Rx discounts available at your local pharmacy; and set medication reminders. Key Features: • Symptom Checker – Choose your symptoms, learn about potential conditions or issues, and lookup treatment and care options. • Do…					Medical	US	2019-10-03
Wellwave	Alchemy		English	android			pain
Wellwave Arthritis	Alchemy		English	android			Arthritis
Wellwave Back Ache	Alchemy		English	android			back Pain
Wellwave Carpal Tunnel	Alchemy		English	android			carpal
Wellwave Painkill	Alchemy		English	android			pain
Wellwave Tooth Ache	Alchemy		English	android			dental
What Causes Back Pain?	Zingy Minds		English	android			back Pain
Where Does It Hurt	K2 Media And Web Design Inc		English	android			pain
Yoga For Back Pain	Saagara		English	android			back Pain
Yoga for Migraines	Saagara LLC		English	iOS			Headache
Zen relax	Avant Wb Solutions SL		Spanish	iOS			pain
